# Supplementary material
Source: Research Square preprint supplement (doi:10.21203/rs.3.rs-9296902/v1)
Supplement: Supplementary file 1 [file a9c62a06276b38fe661c6355.docx]

Electronic Supporting Information

**Retrosynthetic topological synthesis of two-dimensional inorganic crystals with record solar-blind nonlinear optical performance**

Wei Zeng,1 Yao Tian,2 Yalan Deng,3 Ying Long,2 Huixian Chen,2 Congcong Jin,1 Ling Huang,3 Hongmei Zeng,2 Zhien Lin,2 Kang Min Ok,*,1 and Guohong Zou*,2

1Center for Noncentrosymmetric Materials, Department of Chemistry, Sogang University, Seoul 04107, Republic of Korea

2College of Chemistry, Sichuan University, Chengdu 610065, P. R. China

3College of Chemistry and Materials Science, Sichuan Normal University, Chengdu 610066, P. R. China

*Email: kmok@sogang.ac.kr; zough@scu.edu.cn

**Table of contents**

| Sections | Titles | Pages |
| --- | --- | --- |
| Sections S1 | Computational Descriptions. | S3-4 |
| Table S1 | Crystal data and structure refinement for (NH4)SbPO4F·H2O, (NH4)2Sb(P2O7)F, (NH4)Sb2(HPO3)F5, SbAsO3, and (NH4)As2O3Br. | S5 |
| Tables S2 to S6 | Atomic coordinates and equivalent isotropic displacement parameters for (NH4)SbPO4F·H2O, (NH4)2Sb(P2O7)F, (NH4)Sb2(HPO3)F5, SbAsO3, and (NH4)As2O3Br. *U*(eq) is defined as one third of the trace of the orthogonalized *Uij* tensor. | S6-10 |
| Tables S7 to S11 | Selected Bond lengths (Å) and angles (deg) for (NH4)SbPO4F·H2O, (NH4)2Sb(P2O7)F, (NH4)Sb2(HPO3)F5, SbAsO3, and (NH4)As2O3Br. | S11-15 |
| Table S12 | Hydrogen Bonds for (NH4)SbPO4F·H2O, (NH4)2Sb(P2O7)F, (NH4)Sb2(HPO3)F5, and (NH4)As2O3Br. | S16 |
| Table S13 | Birefringence values of representative uniaxial optical crystals with UV cut-off edges spanning 110−280 nm (deep-UV to solar-blind UV region). | S17 |
| Table S14 | Comparison of SHG responses at 1064 nm of representative solar-blind UV NLO materials. | S18 |
| Table S15 | Comparison of birefringence and SHG responses at 1064 nm for representative solar-blind UV NLO materials. | S19 |
| Table S16 | Calculated linear and nonlinear optical properties of the title compounds derived from atom-cutting analysisa. | S20 |
| Table S17 | Calculated dipole moments of polar unit polyhedra in the noncentrosymmetric title compounds (D = Debyes). | S21 |
| Table S18 | Summary of birefringence and NLO properties of the five title compounds designed through retrosynthetic crystal topological chemistry. | S22 |
| Figure S1 | Experimental and calculated PXRD patterns of the title compounds. | S23 |
| Figure S2 | TGA curves of the title compounds under N2 atmosphere. | S24 |
| Figure S3 | IR spectra of the title compounds. | S25 |
| Figure S4 | UV optical diffuse reflectance spectra of the title compounds. | S26 |
| Figure S5 | Calculated electronic band structures of the title compounds. | S27 |
| Figure S6 | Electron localization function (ELF) maps of the title compounds. | S28 |
| References |  | S29-32 |

**Section S1. Computational Descriptions**

To gain deeper insight into the electronic structures of the title compounds, geometric optimization, band-structure calculations, and density-of-states (DOS) / partial DOS (PDOS) analyses were carried out using density functional theory (DFT) as implemented in the CASTEP suite of programs.1 In all calculations, the Perdew-Burke-Ernzerhof (PBE) exchange-correlation functional within the generalized gradient approximation (GGA) was adopted.2 A kinetic energy cutoff of 750 eV was chosen for all materials. The *k*-point meshes used for Brilliouin-zone sampling were set to 4×4×5 for (NH4)SbPO4F·H2O, 4×4×6 for (NH4)2Sb(P2O7)F, 4×3×4 for (NH4)Sb2(HPO3)F5, 7×2×6 for SbAsO3, and 7×7×4 for (NH4)As2O3Br. Norm-conserving pseudopotentials were used throughout all calculations.3

To obtain the linear optical properties, the complex dielectric function *ε*(*ω*) = *ε*1(*ω*) + i*ε*2(*ω*) was calculated within the random phase approximation based on the PBE wavefunctions. The imaginary part of the dielectric function arising from direct interband transitions is given by the expression,

where *Ω, ω, u, ν*, and *c* denote the unit-cell volume, photon frequency, polarization vector of the incident electric field, valence band, and conduction band, respectively. The real part of the dielectric function was subsequently obtained from *ε2* by the Kramers-Kronig transformation,

For the calculation of the static *χ(2)* coefficients, the length-gauge formalism originally derived by Aversa and Sipe4 and later modified by Rashkeev5 was adopted. This formalism has been widely demonstrated to be reliable for evaluating second order susceptibilities in semiconductors and insulating materials.6, 7 In the static limit, the imaginary part of the second-order optical susceptibility can be expressed as:

where *r* is the position operator, *ħωnm = ħωn - ħωm* represents the energy difference between bands *m* and *n*, and *fmn = fm - fn* is the difference in Fermi distribution functions. The subscripts *a*, *b*, and *c* denote Cartesian components, while *rbmn;a* repreents the generalized derivative of the coordinate operator in *k* space,

where *Δanm = (pann - pamm ) / m* corresponds to the difference in electronic velocities between bands *n* and *m.*

**Table S1.** Crystal data and structure refinement for (NH4)SbPO4F·H2O, (NH4)2Sb(P2O7)F, (NH4)Sb2(HPO3)F5, SbAsO3, and (NH4)As2O3Br.

| **Compound** | **(NH4)SbPO4F·H2O** | **(NH4)2Sb(P2O7)F** | **(NH4)Sb2(HPO3)F5** | **SbAsO3** | **(NH4)As2O3Br** |
| --- | --- | --- | --- | --- | --- |
| **Fw** | 271.78 | 350.77 | 436.52 | 244.67 | 295.79 |
| **Crystal System** | Tetragonal | Tetragonal | Orthorhombic | Monoclinic | Hexagonal |
| **Space Group** | *I*4*/m* | *P*4*bm* | *Pca*21 | *P*21/*n* | *P*63*mc* |
| ***a* (Å)** | 6.5646(2) | 8.5826(3) | 8.9350(2) | 4.5687(3) | 5.2576(5) |
| ***b* (Å)** | 6.5646(2) | 8.5826(3) | 10.0427(3) | 13.1151(10) | 5.2576(5) |
| ***c* (Å)** | 14.3955(6) | 5.8491(4) | 8.8719(2) | 5.4155(4) | 12.4246(18) |
| ***α* (°)** | 90 | 90 | 90 | 90 | 90 |
| ***β* (°)** | 90 | 90 | 90 | 94.900(7) | 90 |
| ***γ* (°)** | 90 | 90 | 90 | 90 | 120 |
| ***V*(Å3)** | 620.36(5) | 430.85(4) | 796.09(4) | 323.31(4) | 297.43(7) |
| ***Z*** | 4 | 2 | 4 | 4 | 2 |
| ***ρ*(calcd) (g/cm3)** | 2.910 | 2.704 | 3.642 | 5.027 | 3.303 |
| **Temperature (K)** | 302 | 293 | 293 | 299 | 289 |
| ***λ*(Å)** | 0.71073 | 0.71073 | 0.71073 | 0.71073 | 0.71073 |
| ***F*(000)** | 512.0 | 336.0 | 792.0 | 432.0 | 272.0 |
| ***µ* (mm-1)** | 4.686 | 3.604 | 7.050 | 18.481 | 17.859 |
| ***R*1, *wR*2 (*I*>2*σ*(*I*))a** | 0.016/0.031 | 0.024/0.040 | 0.036/0.085 | 0.032/0.079 | 0.047/0.109 |
| ***R*1, *wR*2 (all data)** | 0.016/0.032 | 0.031/0.041 | 0.038/0.087 | 0.035/0.081 | 0.063/0.118 |
| **GOF on *F*2** | 1.100 | 1.221 | 1.109 | 1.102 | 1.141 |
| **Flack parameter** | / | 0.19(6) | -0.05(5) | / | 0.43(15) |

a*R*1(*F*) = **∑**||*F*o |−|*F*c ||/**∑**|*F*o |, *wR*2 (*F*o2 ) = [**∑**w(*F*o2−*F*c2) 2/**∑**w(*F*o2)2 ] 1/2

**Table S2.** Atomic coordinates and equivalent isotropic displacement parameters for (NH4)SbPO4F·H2O. *U*(eq) is defined as one third of the trace of the orthogonalized *Uij* tensor.

| atom | *x* | *y* | *z* | *U*eq (Å2) |
| --- | --- | --- | --- | --- |
| Sb1 | 0.500000 | 0.500000 | 0.27829 (2) | 0.01403 (12) |
| P1 | 0.500000 | 1.000000 | 0.250000 | 0.0142 (2) |
| F1 | 0.500000 | 0.500000 | 0.41192 (16) | 0.0203 (5) |
| O1 | 0.5570 (2) | 0.8196 (2) | 0.31292 (10) | 0.0197 (3) |
| O2 | 0.7257 (4) | 0.8532 (4) | 0.500000 | 0.0361 (6) |
| N1 | 0.7257 (4) | 0.8532 (4) | 0.500000 | 0.0361 (6) |

**Table S3.** Atomic coordinates and equivalent isotropic displacement parameters for (NH4)2Sb(P2O7)F. *U*(eq) is defined as one third of the trace of the orthogonalized *Uij* tensor.

| atom | *x* | *y* | *z* | *U*eq (Å2) |
| --- | --- | --- | --- | --- |
| Sb1 | 0.5000 | 0.5000 | 0.6015 (3) | 0.0361 (2) |
| O1 | 0.6302 (5) | 0.8698 (5) | 0.3105 (11) | 0.0473 (16) |
| O2 | 0.5819 (15) | 0.7306 (9) | 0.6966 (15) | 0.084 (3) |
| O2A | 0.512 (2) | 0.7529 (19) | 0.650 (3) | 0.016 (4) |
| O3 | 0.5332 (9) | 1.0332 (9) | 0.637 (3) | 0.036 (4) |
| F1 | 0.5000 | 0.5000 | 0.9311 (14) | 0.043 (2) |
| P1 | 0.62218 (15) | 0.87782 (15) | 0.5646 (3) | 0.0295 (4) |
| N1 | 0.8274 (5) | 0.6726 (5) | 0.0617 (12) | 0.0311 (14) |

**Table S4.** Atomic coordinates and equivalent isotropic displacement parameters for (NH4)Sb2(HPO3)F5. *U*(eq) is defined as one third of the trace of the orthogonalized *Uij* tensor.

| atom | *x* | *y* | *z* | *U*eq (Å2) |
| --- | --- | --- | --- | --- |
| Sb1 | 0.45392 (10) | 0.32287 (9) | 0.18535 (14) | 0.0196 (3) |
| Sb2 | 0.49387 (11) | 0.23675 (9) | 0.64044 (15) | 0.0234 (3) |
| P1 | 0.2075 (4) | 0.4917 (4) | 0.3931 (6) | 0.0207 (8) |
| O1 | 0.3012 (12) | 0.3728 (11) | 0.3442 (13) | 0.026 (2) |
| O2 | 0.1669 (14) | 0.4779 (12) | 0.5577 (13) | 0.032 (3) |
| O3 | 0.0697 (14) | 0.5081 (13) | 0.2934 (13) | 0.032 (3) |
| F1 | 0.2827 (10) | 0.1814 (8) | 0.1439 (11) | 0.034 (2) |
| F2 | 0.5224 (12) | 0.2028 (12) | 0.3703 (12) | 0.037 (3) |
| F3 | 0.4988 (12) | 0.1975 (12) | 0.8561 (13) | 0.036 (3) |
| F4 | 0.7103 (10) | 0.2092 (10) | 0.6409 (13) | 0.039 (2) |
| F5 | 0.4805 (11) | 0.0447 (8) | 0.6175 (13) | 0.035 (2) |
| N1 | 0.7504 (19) | 0.0046 (15) | 0.390 (2) | 0.032 (3) |

**Table S5.** Atomic coordinates and equivalent isotropic displacement parameters for SbAsO3. *U*(eq) is defined as one third of the trace of the orthogonalized *Uij* tensor.

| atom | *x* | *y* | *z* | *U*eq (Å2) |
| --- | --- | --- | --- | --- |
| Sb1 | 0.50548 (8) | 0.85415 (3) | 0.82953 (7) | 0.01297 (17) |
| As1 | 0.53482 (12) | 0.59605 (4) | 0.75631 (11) | 0.01080 (18) |
| O1 | 0.6121 (9) | 0.6399 (3) | 0.4569 (9) | 0.0168 (9) |
| O2 | 0.1510 (8) | 0.5955 (3) | 0.6670 (8) | 0.0168 (9) |
| O3 | 0.5659 (10) | 0.7109 (3) | 0.9311 (8) | 0.0195 (9) |

**Table S6.** Atomic coordinates and equivalent isotropic displacement parameters for (NH4)As2O3Br. *U*(eq) is defined as one third of the trace of the orthogonalized *Uij* tensor.

| atom | *x* | *y* | *z* | *U*eq (Å2) |
| --- | --- | --- | --- | --- |
| As1 | 0.0000 | 1.0000 | 0.6036 (5) | 0.0105 (10) |
| As2 | 0.3333 | 0.6667 | 0.6058 (3) | 0.0076 (9) |
| Br1 | −0.3333 | 1.3333 | 0.4766 (3) | 0.0281 (15) |
| O1 | 0.166 (2) | 0.834 (2) | 0.6830 (13) | 0.015 (4) |
| N1 | 0.3333 | 0.6667 | 0.314 (3) | 0.041 (11) |

**Table S7.** Selected Bond lengths [(Å)](file:///E:\article\1%20_atom_site_aniso_label) and angles (deg) for (NH4)SbPO4F·H2O.

| Sb1—F1 | 1.924 (2) | P1—O1 | 1.5370 (13) |
| --- | --- | --- | --- |
| Sb1—O1i | 2.1888 (14) | P1—O1iv | 1.5370 (13) |
| Sb1—O1ii | 2.1888 (14) | P1—O1v | 1.5370 (14) |
| Sb1—O1iii | 2.1888 (14) | P1—O1vi | 1.5370 (14) |
| Sb1—O1 | 2.1887 (14) |  |  |
| F1—Sb1—O1 | 76.84 (4) | O1—Sb1—O1iii | 87.027 (17) |
| F1—Sb1—O1iii | 76.84 (4) | O1—P1—O1vi | 110.32 (5) |
| F1—Sb1—O1ii | 76.84 (4) | O1—P1—O1iv | 107.79 (11) |
| F1—Sb1—O1i | 76.84 (4) | O1—P1—O1v | 110.32 (5) |
| O1—Sb1—O1i | 87.027 (17) | O1vi—P1—O1v | 107.79 (11) |
| O1iii—Sb1—O1i | 153.67 (8) | O1vi—P1—O1iv | 110.32 (5) |
| O1—Sb1—O1ii | 153.67 (8) | O1iv—P1—O1v | 110.32 (5) |
| O1iii—Sb1—O1ii | 87.027 (17) | P1—O1—Sb1 | 124.25 (8) |
| O1ii—Sb1—O1i | 87.027 (17) |  |  |

Symmetry codes: (i) −*y*+1, *x*, *z*; (ii) −*x*+1, −*y*+1, *z*; (iii) *y*, −*x*+1, *z*; (iv) −*x*+1, −*y*+2, *z*; (v) −*y*+3/2, *x*+1/2, −*z*+1/2; (vi) *y*−1/2, −*x*+3/2.

**Table S8.** Selected Bond lengths [(Å)](file:///E:\article\1%20_atom_site_aniso_label) and angles (deg) for (NH4)2Sb(P2O7)F.

| Sb1—O2i | 2.178 (14) | Sb1—O2Ai | 2.181 (12) |
| --- | --- | --- | --- |
| Sb1—O2ii | 2.178 (14) | P1—O1 | 1.483 (5) |
| Sb1—O2iii | 2.178 (14) | P1—O2 | 1.484 (13) |
| Sb1—O2 | 2.178 (14) | P1—O2iv | 1.484 (13) |
| Sb1—F1 | 1.916 (5) | P1—O2Aiv | 1.534 (11) |
| Sb1—O2A | 2.181 (12) | P1—O2A | 1.534 (11) |
| Sb1—O2Aii | 2.181 (12) | P1—O3 | 1.599 (4) |
| Sb1—O2Aiii | 2.181 (12) | P1—O3v | 1.599 (4) |
| F1—Sb1—O2ii | 78.1 (8) | O2Ai—Sb1—O2Aii | 87.3 (3) |
| F1—Sb1—O2i | 78.1 (8) | O1—P1—O2 | 113.9 (14) |
| F1—Sb1—O2 | 78.1 (8) | O1—P1—O2iv | 113.9 (14) |
| F1—Sb1—O2iii | 78.1 (8) | O1—P1—O2Aiv | 116.0 (11) |
| F1—Sb1—O2A | 77.4 (7) | O1—P1—O2A | 116.0 (10) |
| F1—Sb1—O2Aii | 77.4 (7) | O1—P1—O3v | 109.7 (4) |
| F1—Sb1—O2Aiii | 77.4 (7) | O1—P1—O3 | 109.7 (4) |
| F1—Sb1—O2Ai | 77.4 (7) | O2—P1—O2iv | 87.1 (17) |
| O2i—Sb1—O2iii | 87.6 (3) | O2iv—P1—O3v | 125.7 (19) |
| O2iii—Sb1—O2 | 87.6 (3) | O2—P1—O3v | 103.4 (19) |
| O2i—Sb1—O2 | 156.2 (17) | O2A—P1—O3 | 104.8 (7) |
| O2i—Sb1—O2ii | 87.6 (3) | O2A—P1—O3v | 79.0 (10) |
| O2iii—Sb1—O2ii | 156.2 (17) | O2Aiv—P1—O3 | 79.0 (10) |
| O2ii—Sb1—O2 | 87.6 (3) | O2Aiv—P1—O3v | 104.8 (7) |
| O2Aiii—Sb1—O2Aii | 154.8 (15) | P1—O2—Sb1 | 136.7 (8) |
| O2Aii—Sb1—O2A | 87.3 (3) | P1—O2A—Sb1 | 132.8 (6) |
| O2Ai—Sb1—O2A | 154.8 (15) | P1v—O3—P1 | 136.4 (5) |
| O2Aiii—Sb1—O2Ai | 87.3 (3) | O3v—O3—P1 | 75.2 (2) |
| O2Aiii—Sb1—O2A | 87.3 (3) |  |  |

Symmetry codes: (i) −*x*+1, −*y*+1, *z*; (ii) −*y*+1, *x*, *z*; (iii) *y*, −*x*+1, *z*; (iv) −*y*+3/2, −*x*+3/2, *z*; (v) −*x*+1, −*y*+2, *z*.

**Table S9.** Selected Bond lengths [(Å)](file:///E:\article\1%20_atom_site_aniso_label) and angles (deg) for (NH4)Sb2(HPO3)F5.

| Sb1—F1 | 2.120 (9) | Sb2—F3 | 1.954 (11) |
| --- | --- | --- | --- |
| Sb1—F2 | 2.126 (11) | Sb2—F4 | 1.953 (9) |
| Sb1—O1 | 2.025 (11) | Sb2—F5 | 1.943 (8) |
| Sb1—O2i | 2.207 (12) | P1—O1 | 1.522 (12) |
| Sb1—O3ii | 2.207 (12) | P1—O2 | 1.511 (12) |
| Sb2—F1iii | 2.533 (9) | P1—O3 | 1.525 (12) |
| Sb2—F2 | 2.434 (11) |  |  |
| F1—Sb1—F2 | 87.8 (4) | F4—Sb2—F2 | 83.0 (4) |
| F1—Sb1—O2i | 91.8 (4) | F4—Sb2—F3 | 87.0 (5) |
| F1—Sb1—O3ii | 158.3 (4) | F5—Sb2—F1iii | 73.9 (3) |
| F2—Sb1—O2i | 159.5 (4) | F5—Sb2—F2 | 76.4 (4) |
| F2—Sb1—O3ii | 88.1 (4) | F5—Sb2—F3 | 84.5 (5) |
| O1—Sb1—F1 | 78.5 (4) | F5—Sb2—F4 | 85.4 (4) |
| O1—Sb1—F2 | 78.3 (4) | O1—P1—O3 | 111.3 (7) |
| O1—Sb1—O2i | 81.5 (4) | O2—P1—O1 | 109.6 (7) |
| O1—Sb1—O3ii | 79.8 (5) | O2—P1—O3 | 112.1 (7) |
| O3ii—Sb1—O2i | 84.8 (4) | Sb1—F1—Sb2i | 124.0 (4) |
| F2—Sb2—F1iii | 94.8 (3) | Sb1—F2—Sb2 | 130.6 (5) |
| F3—Sb2—F1iii | 88.0 (4) | P1—O1—Sb1 | 139.8 (7) |
| F3—Sb2—F2 | 159.0 (4) | P1—O2—Sb1iii | 132.7 (7) |
| F4—Sb2—F1iii | 159.2 (4) | P1—O3—Sb1iv | 135.5 (8) |

Symmetry codes: (i) −*x*+1/2, *y*, *z*−1/2; (ii) *x*+1/2, −*y*+1, *z*; (iii) −*x*+1/2, *y*, *z*+1/2; (iv) *x*−1/2, −*y*+1, *z*.

**Table S10.** Selected Bond lengths [(Å)](file:///E:\article\1%20_atom_site_aniso_label) and angles (deg) for SbAsO3.

| Sb1—O1i | 1.981 (4) | As1—O1 | 1.784 (5) |
| --- | --- | --- | --- |
| Sb1—O2ii | 2.003 (4) | As1—O2 | 1.779 (4) |
| Sb1—O3 | 1.970 (4) | As1—O3 | 1.778 (4) |
| O1i—Sb1—O2ii | 84.80 (17) | O3—As1—O2 | 100.4 (2) |
| O3—Sb1—O1i | 92.87 (18) | As1—O1—Sb1iii | 125.8 (2) |
| O3—Sb1—O2ii | 91.85 (18) | As1—O2—Sb1iv | 119.3 (2) |
| O2—As1—O1 | 91.22 (19) | As1—O3—Sb1 | 131.0 (2) |
| O3—As1—O1 | 101.4 (2) |  |  |

Symmetry codes: (i) −*x*+1/2, *y*, *z*−1/2; (ii) *x*+1/2, −*y*+1, *z*; (iii) −*x*+1/2, *y*, *z*+1/2; (iv) *x*−1/2, −*y*+1, *z*.

**Table S11.** Selected Bond lengths [(Å)](file:///E:\article\1%20_atom_site_aniso_label) and angles (deg) for (NH4)As2O3Br.

| As2—O1 | 1.800 (18) | As1—O1 | 1.806 (18) |
| --- | --- | --- | --- |
| As2—O1i | 1.800 (18) | As1—O1iii | 1.806 (18) |
| As2—O1ii | 1.800 (18) | As1—O1iv | 1.806 (18) |
| O1—As2—O1i | 94.2 (7) | O1iv—As1—O1iii | 93.0 (7) |
| O1—As2—O1ii | 94.2 (7) | O1—As1—O1iv | 93.0 (7) |
| O1i—As2—O1ii | 94.2 (7) | As2—O1—As1 | 114.7 (8) |
| O1—As1—O1iii | 93.0 (7) |  |  |

Symmetry codes: (i) −*x*+*y*, −*x*+1, *z*; (ii) −*y*+1, *x*−*y*+1, *z*; (iii) −*x*+*y*−1, −*x*+1, *z*; (iv) −*y*+1, *x*−*y*+2, *z*.

**Table S12.** Hydrogen Bonds for (NH4)SbPO4F·H2O, (NH4)2Sb(P2O7)F, (NH4)Sb2(HPO3)F5, and (NH4)As2O3Br.

| Compounds | D—H···A | D—H (Å) | H···A (Å) | D···A (Å) | D—H···A (°) |
| --- | --- | --- | --- | --- | --- |
| (NH4)SbPO4F·H2O | N1—H2···F1 | 0.94 | 2.30 | 3.029 (3) | 133.9 |
| N1—H2···O1 | 0.94 | 2.05 | 2.9202 (18) | 152.1 |
| N1—H1A···N1i | 0.96 | 1.95 | 2.889 (4) | 164.5 |
| N1—H1B···N1ii | 0.96 | 1.95 | 2.889 (4) | 164.4 |
| O2—H2···F1 | 0.94 | 2.30 | 3.029 (3) | 133.9 |
| O2—H2···O1 | 0.94 | 2.05 | 2.9202 (18) | 152.1 |
| Symmetry codes: (i) *y*, −*x*+2, *z*; (ii) −*y*+2, *x*, *z*. | | | | |
| (NH4)2Sb(P2O7)F | N1—H1A···O1 | 0.97 | 2.52 | 3.015 (6) | 111.3 |
| N1—H1A···O1ii | 0.97 | 2.52 | 3.015 (6) | 111.3 |
| N1—H1B···O2 | 0.96 | 2.50 | 3.41 (5) | 157.0 |
| N1—H1B···O2A | 0.96 | 2.09 | 2.919 (10) | 143.8 |
| N1—H1C···O1iii | 0.96 | 2.09 | 2.785 (7) | 127.7 |
| N1—H1C···O2iv | 0.96 | 2.49 | 2.962 (12) | 110.1 |
| N1—H1C···O2v | 0.96 | 2.49 | 2.962 (12) | 110.1 |
| Symmetry codes: (i) *x*, *y*, 1+*z*; (ii) 1−*x*, 2−*y*, 1+*z*; (iii)1−*y*, *x*, 1+*z*; (iv) 1−*y*, *x*, *z*; (v) *x*−1/2, −*y*+3/2, *z*. | | | | |
| (NH4)Sb2(HPO3)F5 | N1—H1*A*···F3i | 0.88 (1) | 2.45 (16) | 2.98 (2) | 118.5 |
| N1—H1*A*···F4 | 0.88 (1) | 2.44 (14) | 3.05 (2) | 126.3 |
| N1—H1*A*···F5ii | 0.88 (1) | 2.34 (15) | 2.92 (2) | 121.9 |
| N1—H1*B*···F1iii | 0.88 (1) | 2.3 (2) | 2.93 (2) | 126.0 |
| N1—H1*B*···F3iv | 0.88 (1) | 2.38 (14) | 3.03 (2) | 129.1 |
| N1—H1*B*···F5 | 0.88 (1) | 2.5 (2) | 3.17 (2) | 130.9 |
| N1—H1*C*···F1ii | 0.88 (1) | 2.21 (14) | 2.892 (19) | 132.8 |
| N1—H1*C*···F2ii | 0.88 (1) | 2.44 (15) | 3.20 (2) | 146.4 |
| N1—H1*D*···F2 | 0.88 (1) | 2.2 (3) | 2.86 (2) | 125.0 |
| N1—H1*D*···F4i | 0.88 (1) | 2.3 (2) | 3.05 (2) | 136.8 |
| Symmetry codes: (i) −*x*+3/2, *y*, *z*−1/2; (ii) *x*+1/2, −*y*, *z*; (iii) −*x*+1, −*y*, *z*+1/2; (iv) −*x*+1, −*y*, *z*−1/2. | | | | |
| (NH4)As2O3Br | N1—H1B···Br1i | 0.89 | 2.85 | 3.64 (2) | 149.1 |
| N1—H1B···O1ii | 0.89 | 2.62 | 3.09 (2) | 114.1 |
| N1—H1B···O1iii | 0.89 | 2.62 | 3.09 (2) | 114.1 |
| Symmetry codes: (i) *x*, *y*−1, *z*; (ii) −*x*, −*y*+1, *z*−1/2; (iii) *y*−1, −*x*+*y*, *z*−1/2. | | | | |

**Table S13.** Birefringence values of representative uniaxial optical crystals with UV cut-off edges spanning 110−280 nm (deep-UV to solar-blind UV region).

| Compounds | Birefringence | Ref |
| --- | --- | --- |
| MgF2 | 0.012@546 nm | 8 |
| ZrOF4H2 | 0.035@546 nm | 9 |
| Y3F(SeO3)4 | 0.036@546 nm | 10 |
| K3B6O10Br | 0.048@546 nm | 11 |
| SBBO | 0.062@546 nm | 12 |
| K4Sb(SO4)3Cl | 0.068@546 nm | 13 |
| SnB2O3F2 | 0.071@546 nm | 14 |
| KBBF | 0.076@546 nm | 15 |
| Na3Sc2(PO4)2F3 | 0.0978@546 nm | 16 |
| KSrCO3F | 0.102@546 nm | 17 |
| **(NH4)SbPO4F·H2O** | **0.12@546 nm** | **This work** |
| *α*-BBO | 0.122@546 nm | 18 |
| **(NH4)2Sb(P2O7)F** | **0.15@546 nm** | **This work** |
| CaCO3 | 0.174@533 nm | 19 |
| K3Nb3Ge2O13 | 0.196@546 nm | 20 |
| *β*-Sc(IO3)3 | 0.219@546 nm | 21 |
| **(NH4)As2O3Br** | **0.24@546 nm** | **This work** |

**Table S14.** Comparison of SHG responses at 1064 nm of representative solar-blind UV NLO materials.

| Compounds | SHG response  (× KDP) | Ref |
| --- | --- | --- |
| Rb3PbBi(P2O7)2 | 2.8 | 22 |
| KSrCO3F | 3.3 | 17 |
| SnB2O3F2 | 4 | 14 |
| **(NH4)2Sb(P2O7)F** | **4** | **This work** |
| Sc(HSeO3)3 | 5 | 23 |
| *β*-BBO | 5.3 | 12 |
| Y3F(SeO3)4 | 5.5 | 10 |
| Y(OH)2NO3 | 5.6 | 24 |
| PbB5O7F3 | 6 | 25 |
| BIBO | 8.2 | 12 |
| Ba4B11O20F | 10 | 26 |
| KNO3SO3NH3 | 10 | 27 |
| Pb3Mg3TeP2O14 | 13.5 | 28 |
| PbBe2B2O6 | 18.5 | 29 |
| Li3(OH)PbSiO4 | 21 | 30 |
| **(NH4)As2O3Br** | **23.3** | **This work** |

**Table S15.** Comparison of birefringence and SHG responses at 1064 nm for representative solar-blind UV NLO materials.

| Compounds | Birefrin-gence | SHG response  (× KDP) | Ref | Compounds | Birefrin-gence | SHG response  (× KDP) | Ref |
| --- | --- | --- | --- | --- | --- | --- | --- |
| (NH4)2PO3F | 0.035 | 1 | 31 | LiZn(OH)CO3 | 0.147 | 3.2 | 54 |
| KDP | 0.0417 | 1 | 12 | Cs3Zn6B9O21 | 0.062 | 3.3 | 55 |
| Ba4B8TeO19 | 0.055 | 1 | 32 | KSrCO3F | 0.102 | 3.3 | 17 |
| NaNH4PO3F⋅H2O | 0.035 | 1.1 | 33 | KCaCO3F | 0.105 | 3.6 | 17 |
| (NH4)2B4SO10 | 0.053 | 1.1 | 34 | SBBO | 0.062 | 3.8 | 12 |
| *β*-CsBa2(PO3)5 | 0.01 | 1.14 | 35 | (C(NH2)3)6-(PO4)2·3H2O | 0.078 | 3.8 | 56 |
| KMg(H2O)PO4 | 0.018 | 1.14 | 36 | CaZn2(BO3)2 | 0.081 | 3.8 | 57 |
| Rb4Mg4(P2O7)3 | 0.01 | 1.4 | 37 | Ba3(ZnB5O10)PO4 | 0.032 | 4 | 58 |
| RbNaMgP2O7 | 0.031 | 1.4 | 38 | NaSr3Be3B3O9F4 | 0.057 | 4 | 59 |
| [Ag(NH3)2]2SO4 | 0.102 | 1.4 | 39 | K5NbOF4(NbF7)2 | 0.07 | 4 | 60 |
| CsZn2B3O7 | 0.056 | 1.5 | 40 | SnB2O3F2 | 0.071 | 4 | 14 |
| K3Sr3Li2Al4B6O20F | 0.0574 | 1.7 | 41 | Ba2(OH)3NO3 | 0.08 | 4 | 61 |
| Rb3B11PO19F3 | 0.08 | 1.7 | 42 | **(NH4)2Sb(P2O7)F** | **0.15** | **4** | **This work** |
| *β*-Rb2Al2B2O7 | 0.057 | 2 | 12 | K2Sb(P2O7)F | 0.157 | 4 | 62 |
| KBBF | 0.076 | 2 | 12 | SnB2O3F2 | 0.071 | 4 | 14 |
| CaB8O15H4 | 0.093 | 2 | 43 | (NH4)2Bi2(SO4)2Cl4 | 0.055 | 4.8 | 63 |
| (NH4)2Ca2Y4-(CO3)9·H2O | 0.04 | 2.1 | 44 | KGeOPO4 | 0.03 | 5 | 64 |
| ZrOF4H2 | 0.035 | 2.2 | 9 | Sc(HSeO3)3 | 0.105 | 5 | 23 |
| LBO | 0.0426 | 2.4 | 12 | NaZnCO3(OH) | 0.114 | 5.2 | 65 |
| CLBO | 0.0526 | 2.5 | 12 | *β*-BBO | 0.119 | 5.3 | 12 |
| Y8O(OH)15(CO3)3Cl | 0.09 | 2.5 | 45 | KLi(HC3N3O3)-  ·2H2O | 0.186 | 5.3 | 66 |
| KNa2La2(BO3)3 | 0.019 | 2.6 | 46 | Y3F(SeO3)4 | 0.036 | 5.5 | 10 |
| Ba(SO3NH2)2 | 0.03 | 2.7 | 47 | Y(OH)2NO3 | 0.124 | 5.6 | 24 |
| NaLu(SeO3)2 | 0.128 | 2.7 | 48 | PbB5O7F3 | 0.12 | 6 | 25 |
| Rb3PbBi(P2O7)2 | 0.03 | 2.8 | 22 | BIBO | 0.174 | 8.2 | 12 |
| K3B6O10Br | 0.048 | 3 | 11 | Ba4B11O20F | 0.015 | 10 | 26 |
| Cs3[(BOP)2(B3O7)3] | 0.075 | 3 | 49 | KNO3SO3NH3 | 0.096 | 10 | 27 |
| Ca2Na3(CO3)3F | 0.082 | 3 | 50 | Pb3Mg3TeP2O14 | 0.041 | 13.5 | 67 |
| CsSbF2SO4 | 0.112 | 3 | 51 | PbBe2B2O6 | 0.171 | 18.5 | 29 |
| NH4B4O6F | 0.117 | 3 | 52 | Li3(OH)PbSiO4 | 0.082 | 21 | 30 |
| ZrF2SO4 | 0.074 | 3.2 | 53 | **(NH4)As2O3Br** | **0.24** | **23.3** | **This work** |

**Table S16.** Calculated linear and nonlinear optical properties of the title compounds derived from atom-cutting analysisa.

| compounds | properties | total | N | H | Sb | As | P | O | F/Br |
| --- | --- | --- | --- | --- | --- | --- | --- | --- | --- |
| (NH4)SbPO4F·H2O | Δ*n* | 0.11 | -9.0% | -16.4% | 78.6% | N/A | -3.4% | 66.4% | -16.2% |
| (NH4)2Sb(P2O7)F | Δ*n* | 0.17 | -13.9% | -20.0% | 72.1% | N/A | -7.7% | 71.3% | -1.8% |
| *d*31 | 2.3 | 2.4% | 5.4% | 30.1% | N/A | 4.3% | 48.2% | 9.5% |
| (NH4)Sb2(HPO3)F5 | Δ*n* | 0.04 | 0.8% | -5.5% | 50.9% | N/A | 0.5% | 23.8% | 29.5% |
| *d*33 | 0.2 | 2.4% | 4.1% | 32.3% | N/A | 3.0% | 22.2% | 36.0% |
| SbAsO3 | Δ*n* | 0.17 | N/A | N/A | 39.0% | 9.0% | N/A | 52.0% | N/A |
| (NH4)As2O3Br | Δ*n* | 0.24 | -6.3% | -17.3% | N/A | 56.8% | N/A | 62.6% | 4.3% |
| *d*31 | 10.0 | 2.2% | 10.0% | N/A | 27.9% | N/A | 26.8% | 33.1% |
| a*d* values in pm/V. | | | | | | | | | |

**Table S17.** Calculated dipole moments of polar unit polyhedra in the noncentrosymmetric title compounds (D = Debyes).

| (NH4)2Sb(P2O7)F | | | | |
| --- | --- | --- | --- | --- |
| Polar unit  (a unit cell) | Dipole moment (D) | | | |
| x-component | y-component | z-component | total magnitude |
| SbO4F | 0 | 0 | -107.84 | 107.84 |
| P2O7 | 0 | 0 | -21.35 | 21.35 |
| Net dipole moment | 0 | 0 | -129.19 | 129.19 |
| (NH4)Sb2(HPO3)F5 | | | | |
| SbO3F2 | 0 | 0 | -50.04 | 50.04 |
| HPO3 | 0 | 0 | -3.38 | 3.38 |
| SbF3 | 0 | 0 | -53.05 | 53.05 |
| Net dipole moment | 0 | 0 | -106.47 | 106.47 |
| (NH4)As2O3Br | | | | |
| AsO3 | 0 | 0 | -188.48 | 188.48 |
| Net dipole moment | 0 | 0 | -188.48 | 188.48 |

**Table S18.** Summary of birefringence and NLO properties of the five title compounds designed through retrosynthetic crystal topological chemistry.

| compounds | birefringence  (@546 nm) | SHG coefficient  (× KDP)a | units | geometric  coefficient g | densities of units (n/V)  (Å-3) | sum of  (n/V) × g  (Å-3) |
| --- | --- | --- | --- | --- | --- | --- |
| (NH4)SbPO4F·H2O | 0.11 | N/Ab | SbO4F | 1 | 6.475 | 6.540 |
| PO4 | 0.01 | 6.475 |
| (NH4)2Sb(P2O7)F | 0.17 | 5.9 | SbO4F | 1 | 4.347 | 8.694 |
| P2O7 | 1 | 4.347 |
| (NH4)Sb2(HPO3)F5 | 0.04 | 0.5 | SbO3F2 | 0.70 | 5.024 | 6.531 |
| SbF3 | 0.47 | 5.024 |
| HPO3 | 0.13 | 5.024 |
| SbAsO3 | 0.17 | N/A | SbO3 | 0.87 | 12.372 | 16.082 |
| AsO3 | 0.43 | 12.372 |
| (NH4)As2O3Br | 0.24 | 25.6 | AsO3 | 1 | 13.449 | 13.449 |
| a *d36* (KDP) = 0.39 pm/V  b not available | | | | | | |


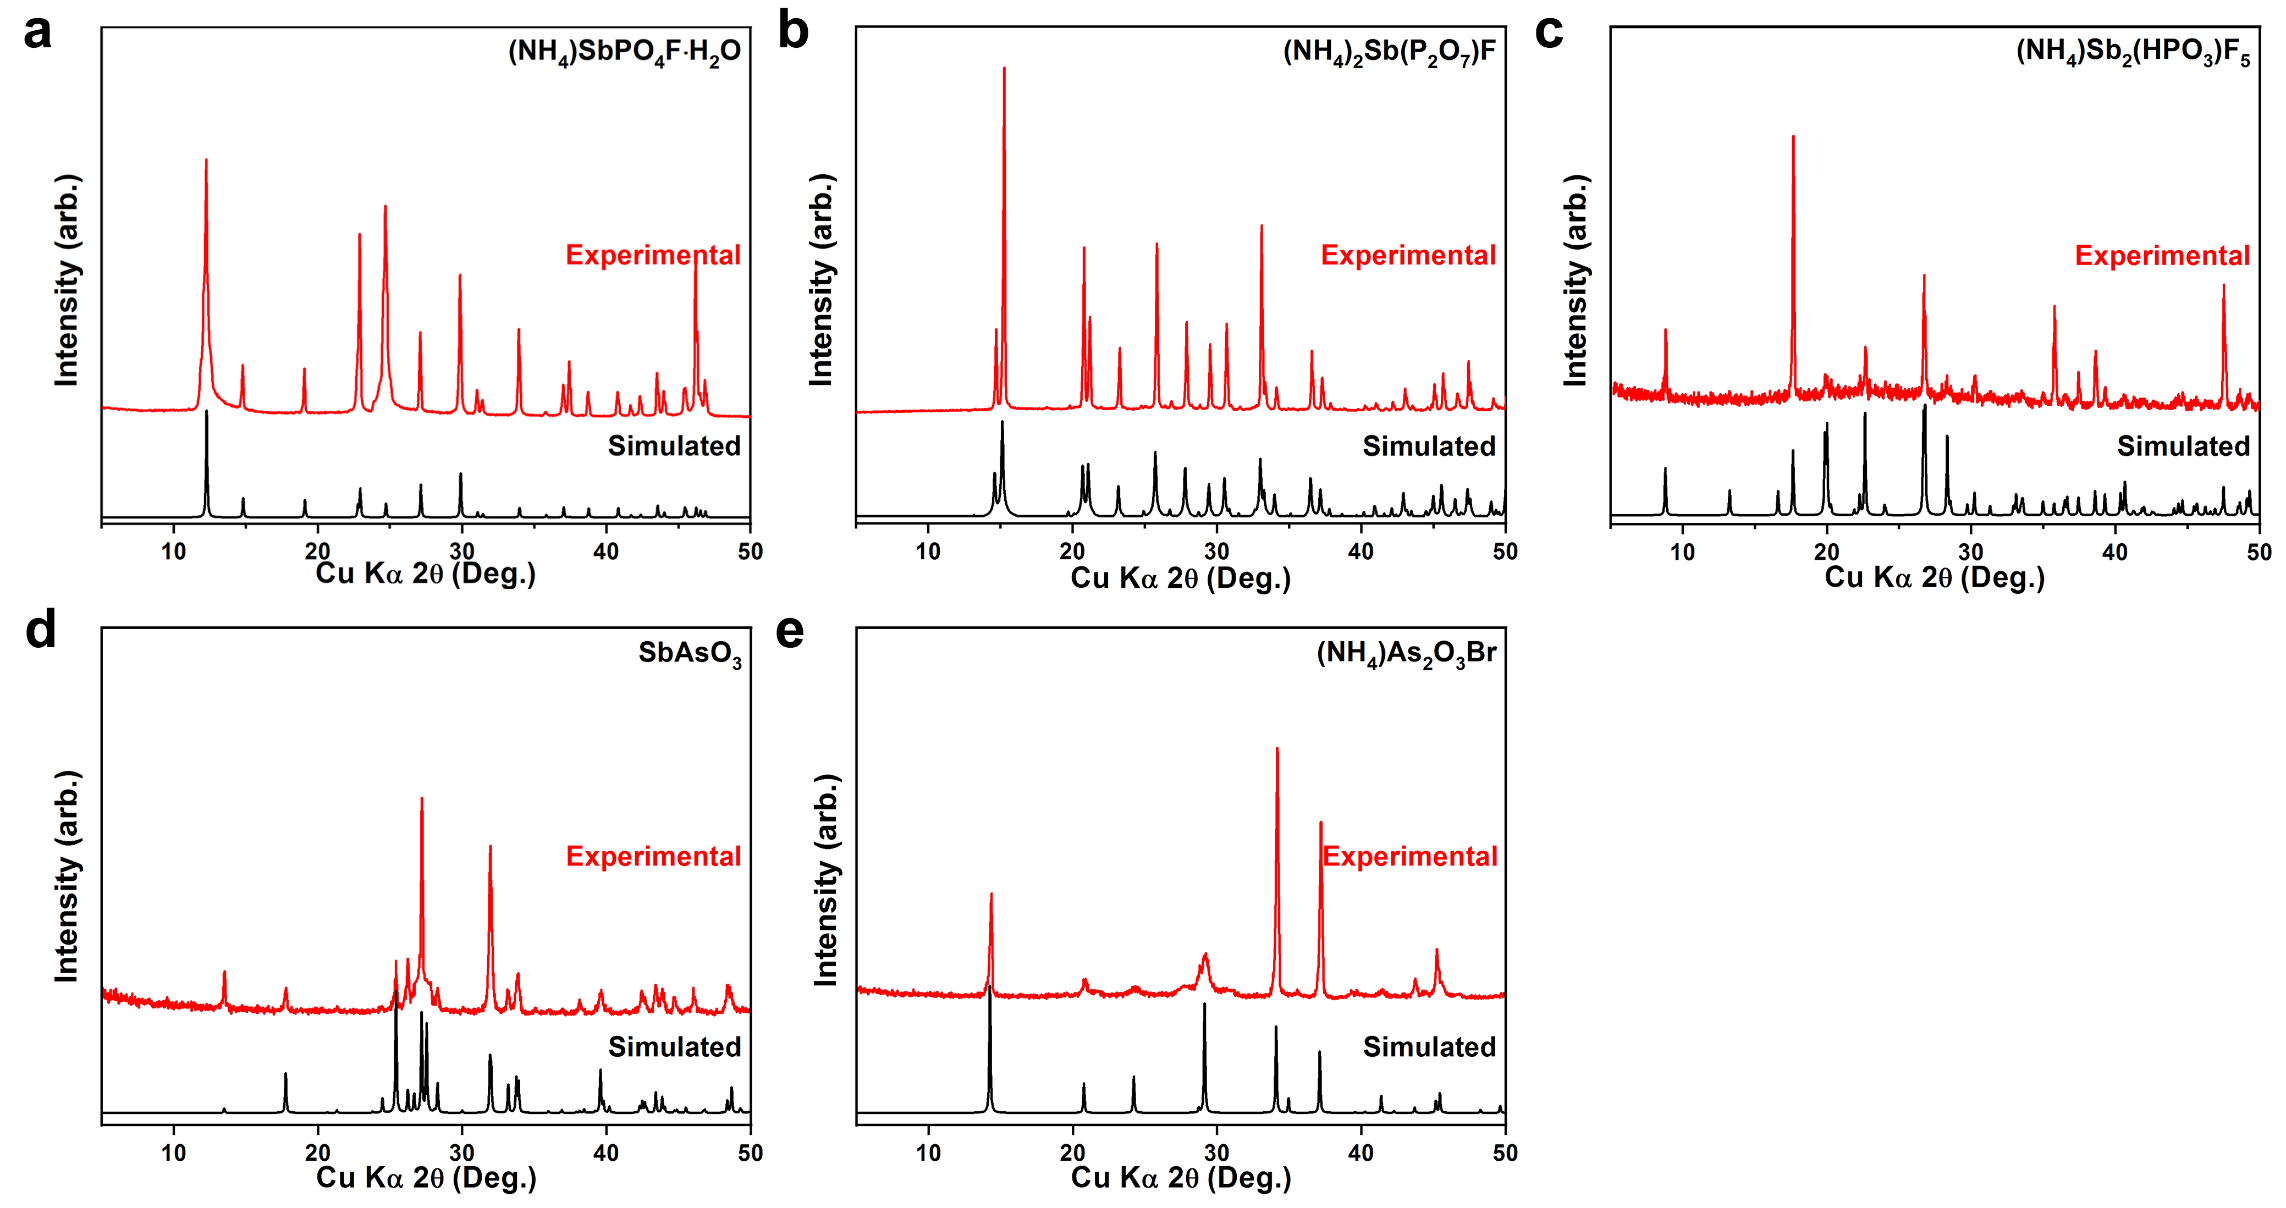


**Figure S1.** Experimental and calculated PXRD patterns of the title compounds.


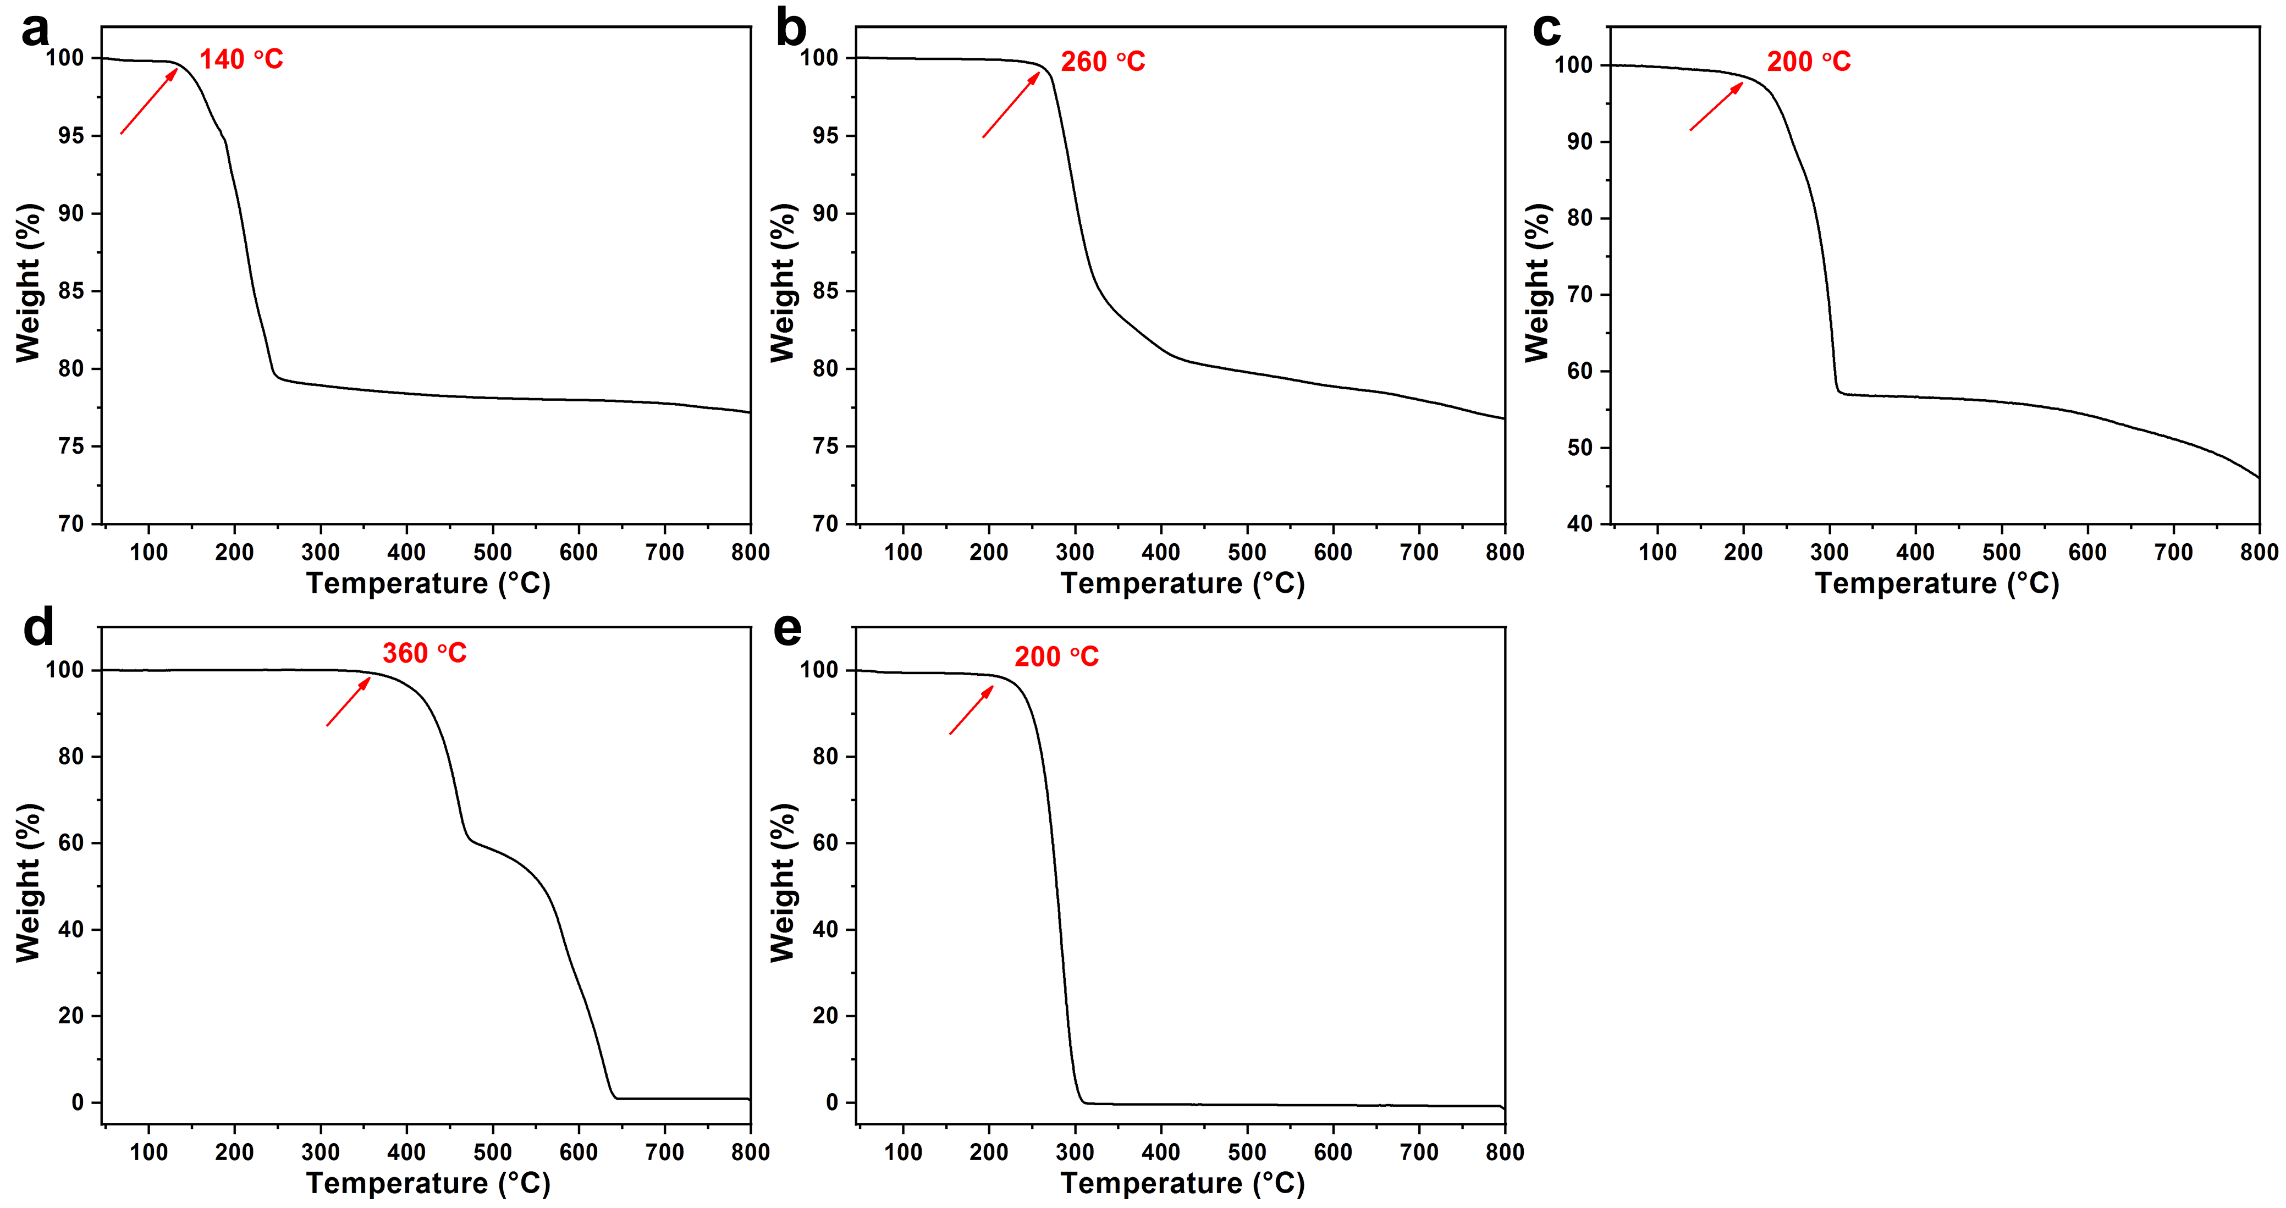


**Figure S2**. TGA curves of the title compounds under N2 atmosphere.


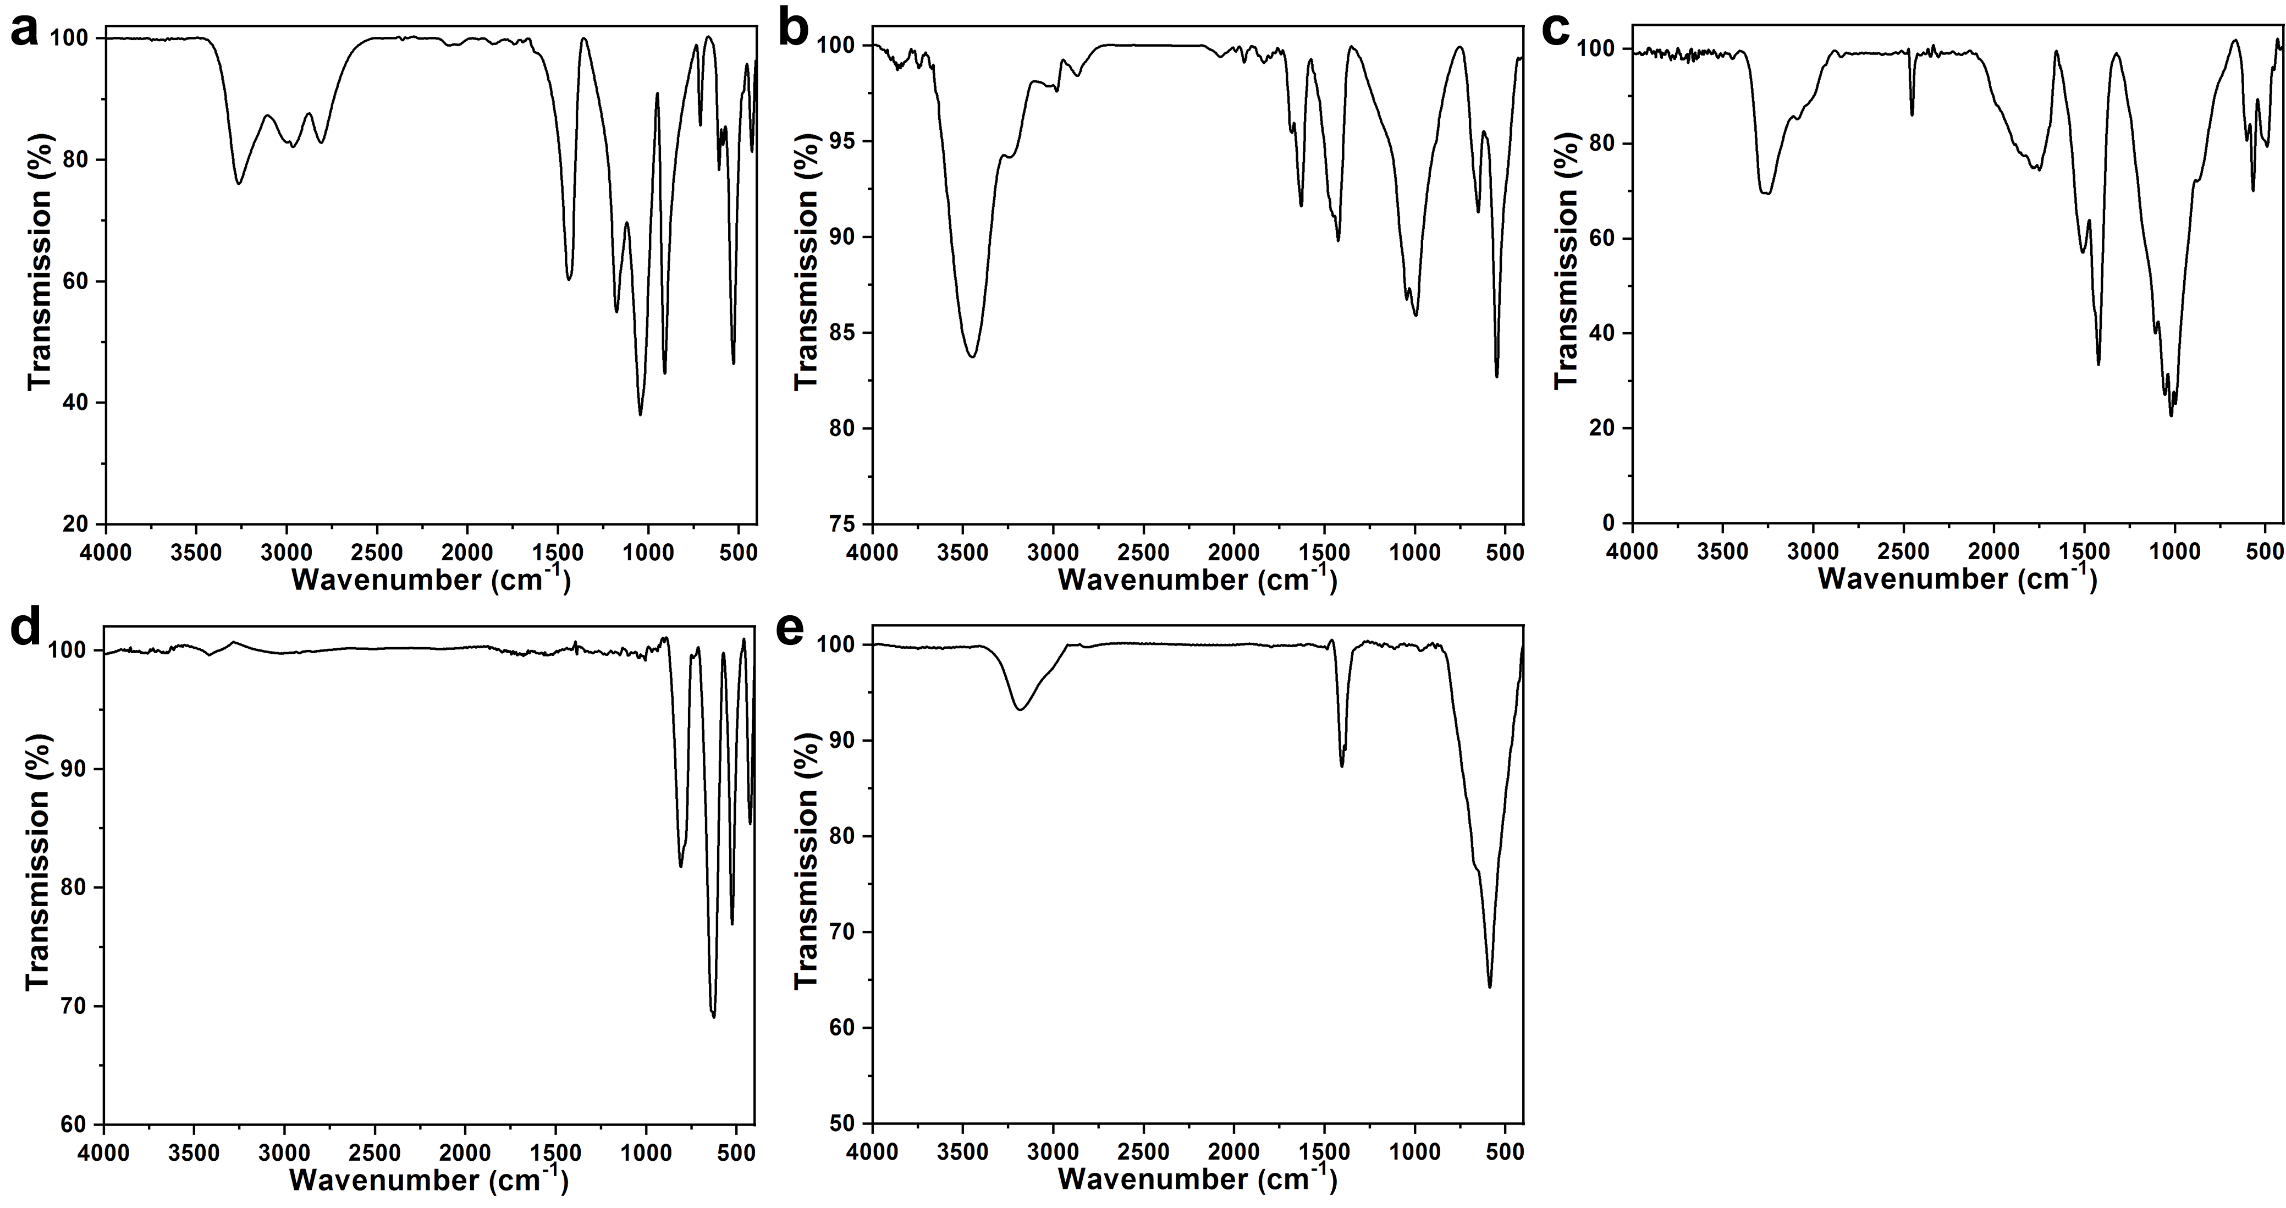


**Figure S3**. IR spectra of the title compounds.


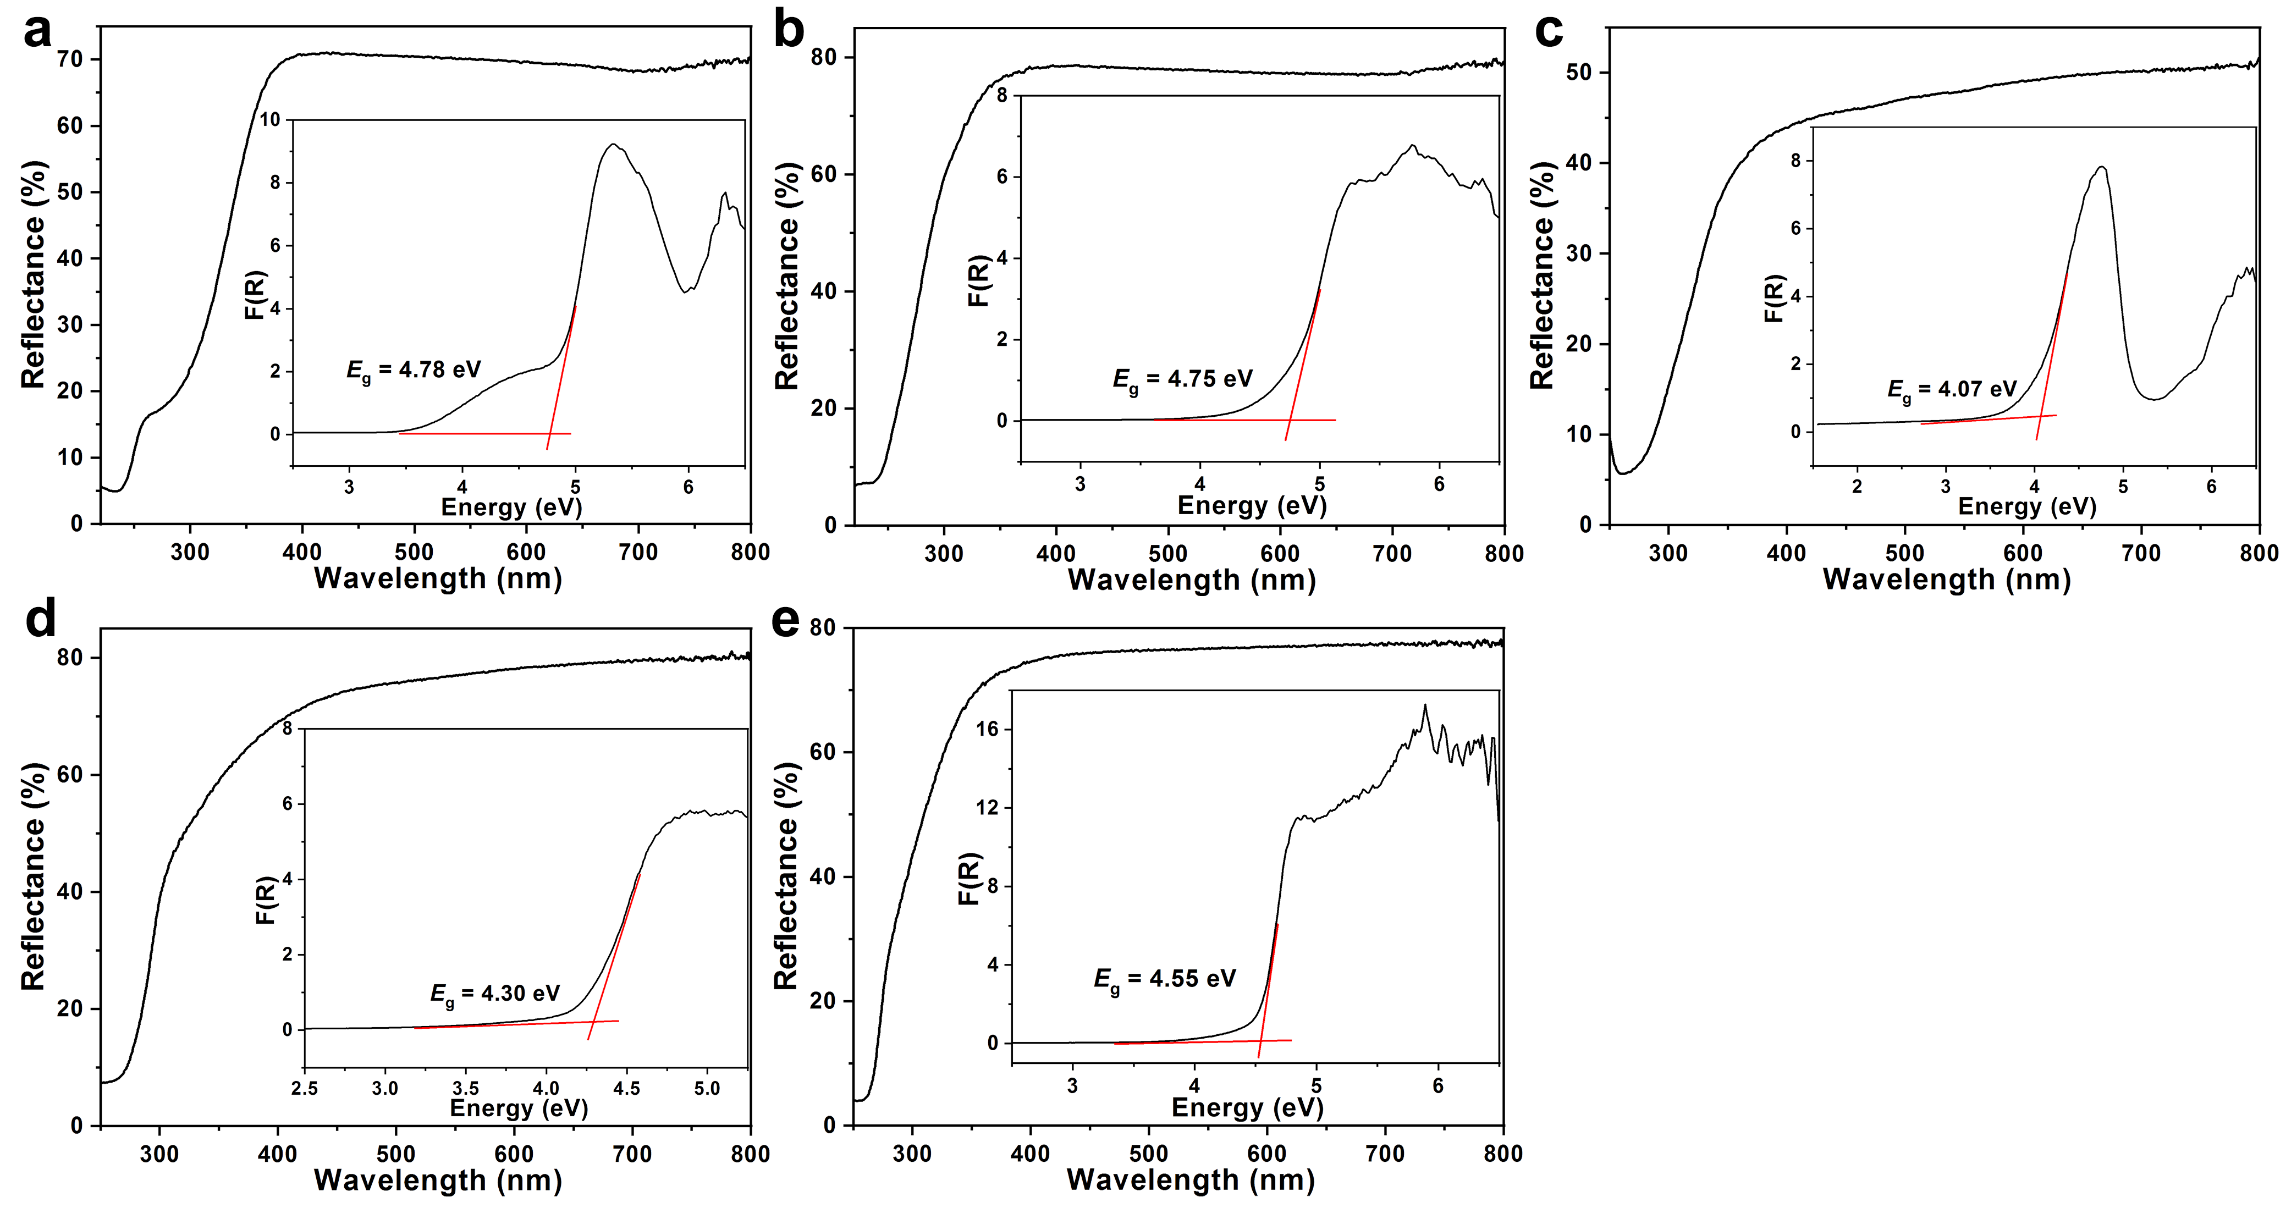


**Figure S4.** UV optical diffuse reflectance spectra of the title compounds.


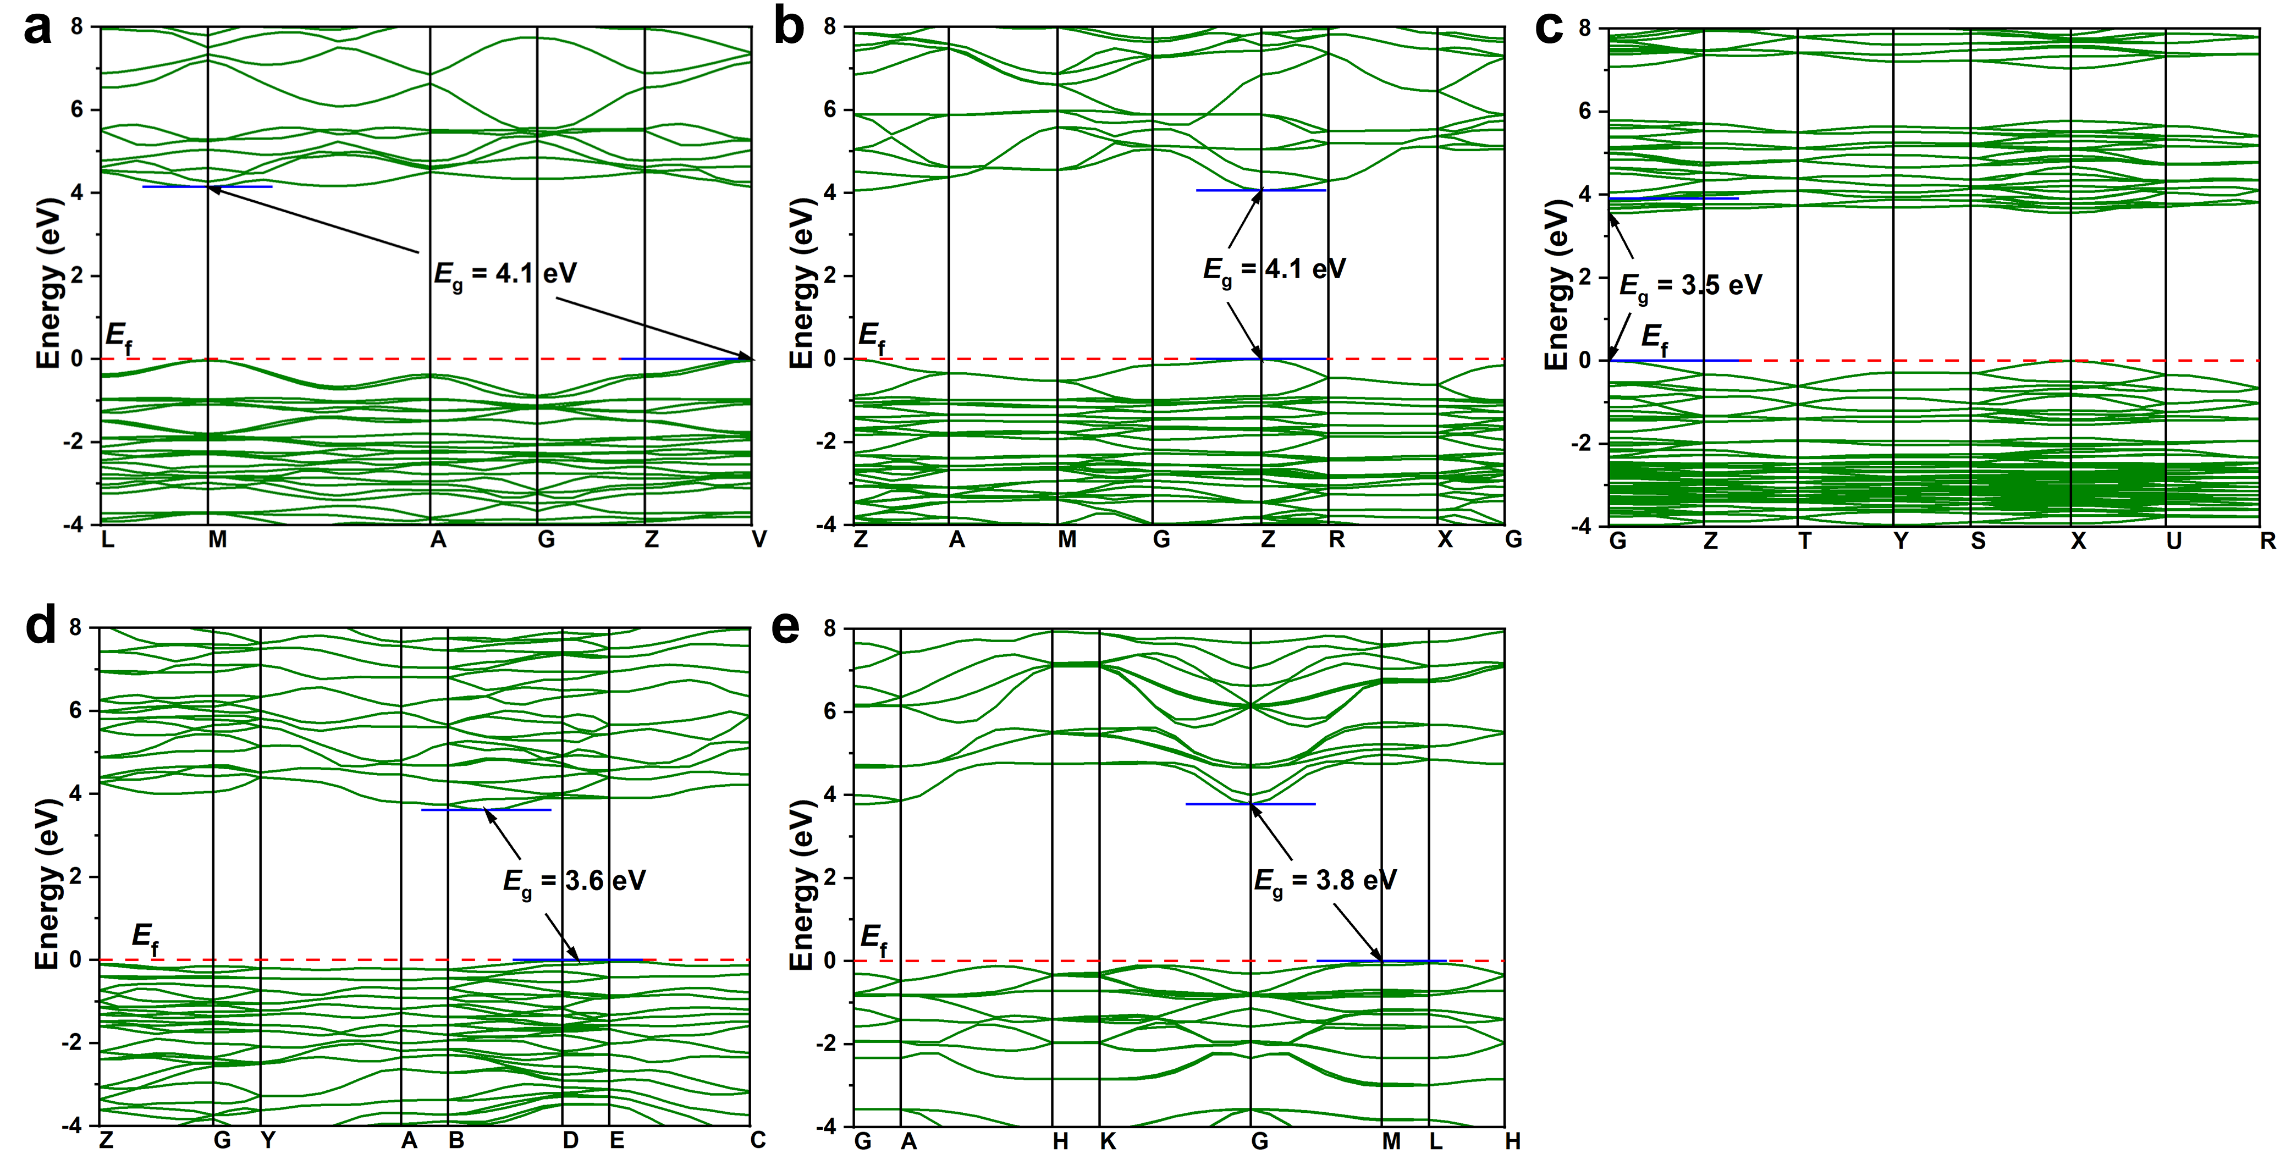


**Figure S5.** Calculated electronic band structures of the title compounds.


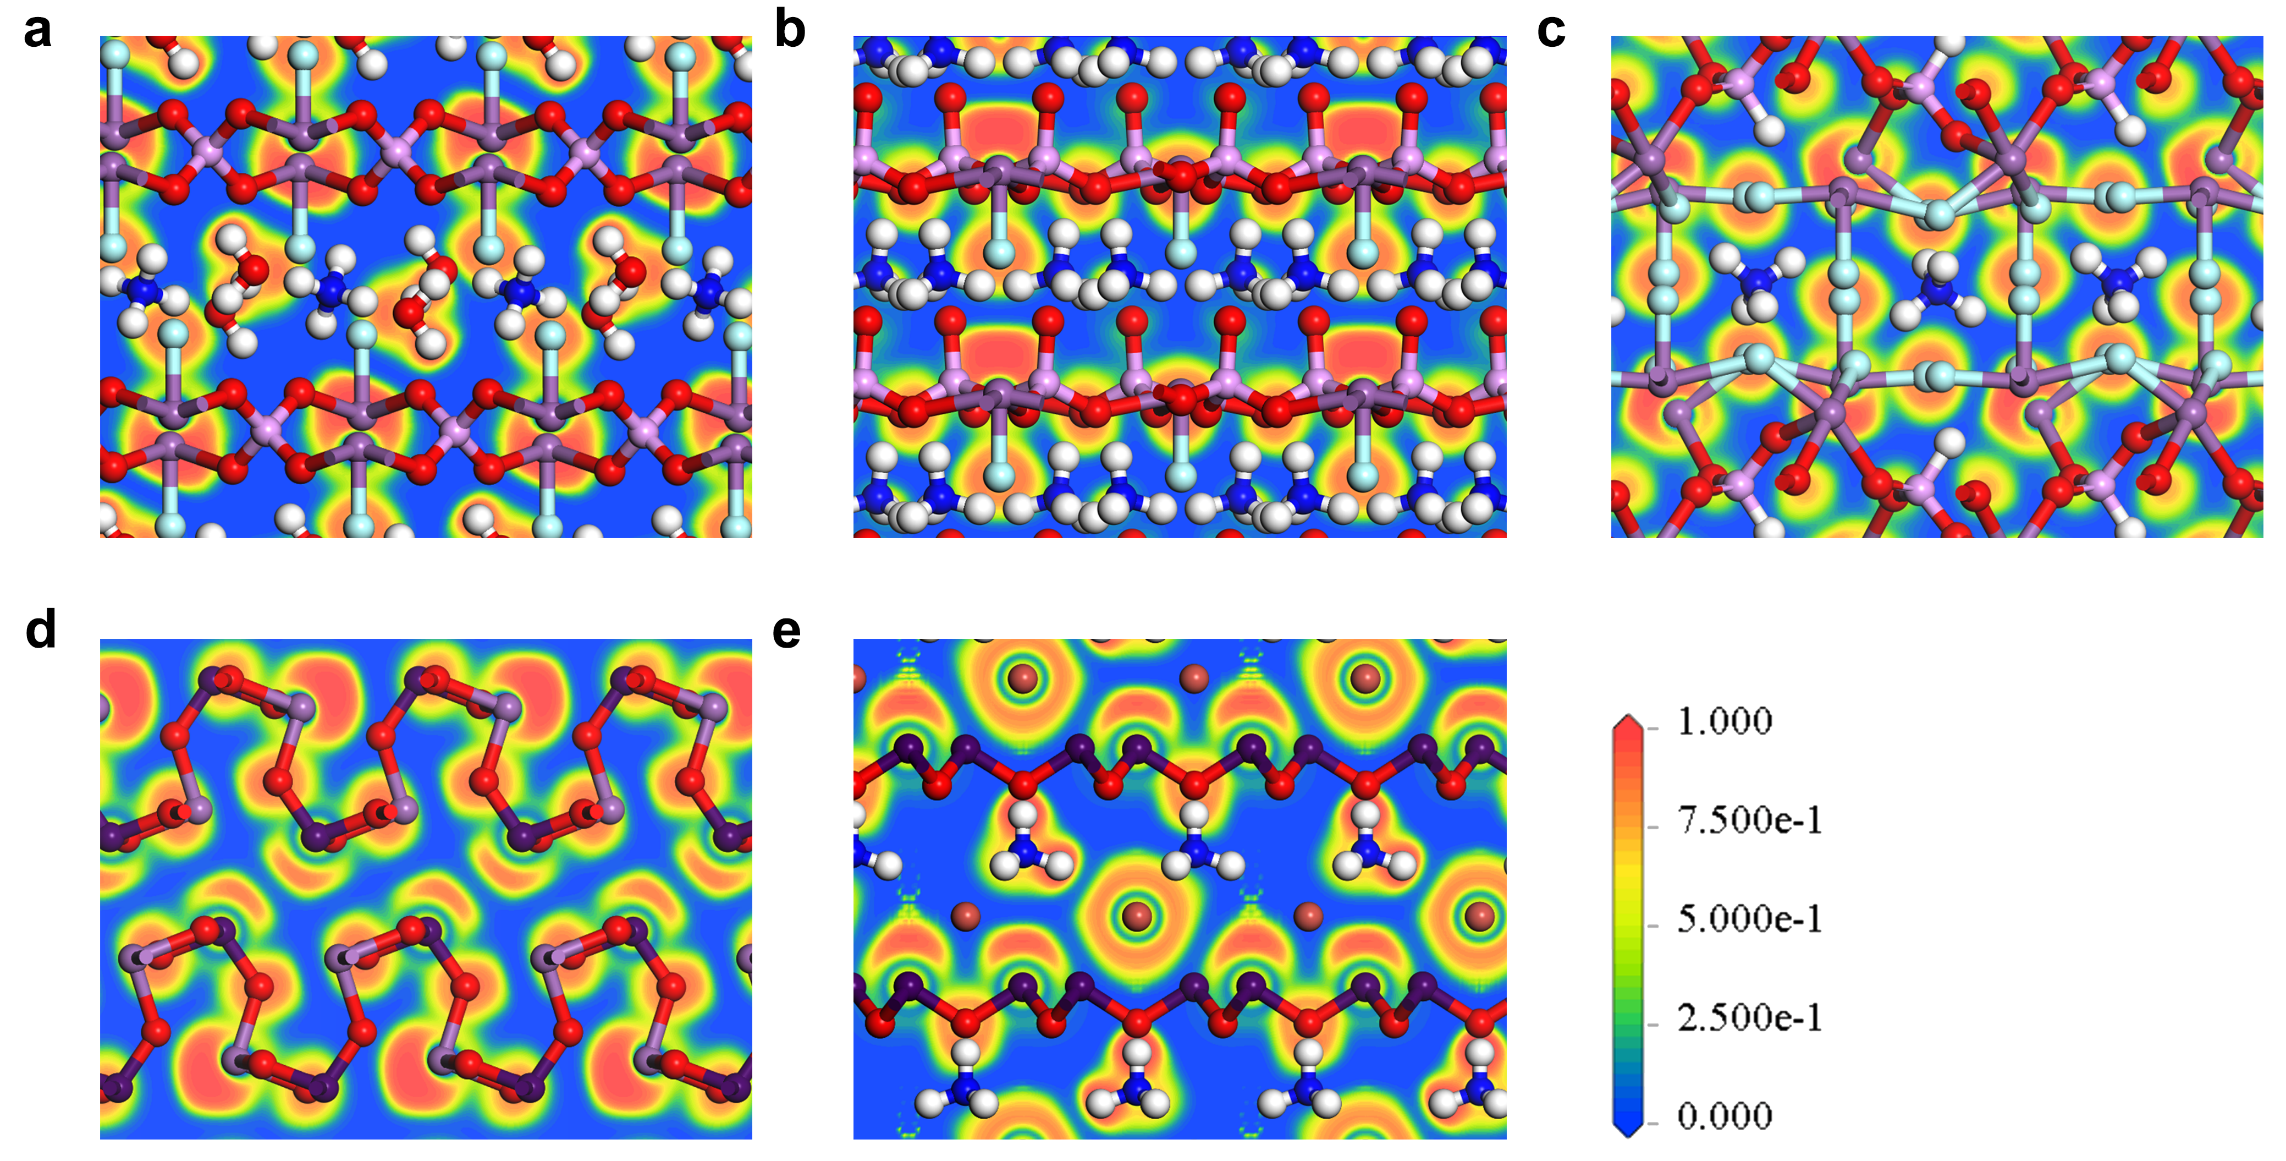


**Figure S6.** Electron localization function (ELF) maps of the title compounds.

**References**

1. Segall, M. D., Lindan, P. J. D., Probert, M. J., Pickard, C. J., Hasnip, P. J., Clark, S. J. & Payne, M. C. First-principles Simulation: Ideas, Illustrations and The CASTEP Code. *J. Phys.: Condens. Matter* **14**, 2717 (2002).
2. Perdew, J. P., Burke, K. & Ernzerhof, M. Generalized Gradient Approximation Made Simple. *Phys. Rev. Lett.* **77**, 3865–3868 (1996).
3. Kobayashi, K. Norm-conserving Pseudopotential Database (NCPS97). *Comput. Mater. Sci.* **14**, 72–76 (1999).
4. Kresse, G. VASP, version 5.3.5. <http://cms.mpi.univie.ac.at/vasp/vasp/vasp.html> (2014).
5. Rashkeev, S. N., Lambrecht, W. R. L. & Segall, B. Efficient ab Initio Method for The Calculation of Frequency-dependent Second-order Optical Response in Semiconductors. *Phys. Rev. B* **57**, 3905 (1998).
6. Champagne, B. & Bishop, D. M. Calculations of Nonlinear Optical Properties for The Solid State. *Adv. Chem. Phys.* **126**, 41–92 (2003).
7. Reshak, A. H., Auluck, S. & Kityk, I. V. Specific Features in The Band Structure And Linear And Nonlinear Optical Susceptibilities of La2CaB10O19 Crystals. *Phys. Rev. B* **75**, 245120 (2007).
8. Sedlmeir, F., Zeltner, R., Leuchs, G. & Schwefel, H. G. High-Q MgF2 Whispering Gallery Mode Resonators for Refractometric Sensing in Aqueous Environment. *Opt. Express* **22**, 30934–30942 (2014).
9. Jiang, C. B., Jiang, X. X., Wu, C., Huang, Z. P., Lin, Z. S., Humphrey, M. G. & Zhang, C. Isoreticular Design of KTiOPO4-Like Deep-Ultraviolet Transparent Materials Exhibiting Strong Second-Harmonic Generation. *J. Am. Chem. Soc.* **144**, 20394–20399 (2022).
10. Li, P. F., Hu, C. L., Kong, F. & Mao, J. G. The First UV Nonlinear Optical Selenite Material: Fluorination Control in CaYF(SeO3)2 and Y3F(SeO3)4. *Angew. Chem. Int. Ed.* **62**, e202301420 (2023).
11. Zhang, M., Pan, S. L., Fan, X. Y., Zhou, Z. X., Poeppelmeier, K. R. & Yang, Y. Crystal Growth and Optical Properties of a Noncentrosymmetric Haloid Borate, K3B6O10Br. *CrystEngComm* **13**, 2899–2903 (2011).
12. Nikogosyan, N. Nonlinear Optical Crystals: A Complete Survey (*Springer: Berlin* 2005).
13. Yang, F., Wang, L., Ge, Y. W., Huang, L., Gao, D. J., Bi, J. & Zou, G. H. K4Sb(SO4)3Cl: The First Apatite-Type Sulfate Ultraviolet Nonlinear Optical Material with Sharply Enlarged Birefringence. *J. Alloys Compd.* **834**, 155154 (2020).
14. Luo, M., Liang, F., Song, Y. X., Zhao, D., Ye, N. & Lin, Z. S. Rational Design of the First Lead/Tin Fluorooxoborates MB2O3F2 (M = Pb, Sn), Containing Flexible Two-Dimensional [B6O12F6]∞ Single Layers with Widely Divergent Second Harmonic Generation Effects. *J. Am. Chem. Soc.* **140**, 6814–6817 (2018).
15. Wu, B., Tang, D., Ye, N. & Chen, C. Linear and Nonlinear Optical Properties of the KBe2BO3F2 (KBBF) Crystal. *Opt. Mater.* **5**, 105–109 (1996).
16. Xu, F., Peng, G., Lin, C., Zhao, D., Li, B., Zhang, G., Yang, S. & Ye, N. Na3Sc2(PO4)2F3: Rational Design and Synthesis of an Alkali Rare-Earth Phosphate Fluoride as an Ultraviolet Nonlinear Optical Crystal with an Enlarged Birefringence. *J. Mater. Chem. C* **8**, 4965–4972 (2020).
17. Zou, G., Ye, N., Huang, L. & Lin, X. Alkaline–Alkaline Earth Fluoride Carbonate Crystals ABCO3F (A = K, Rb, Cs; B = Ca, Sr, Ba) as Nonlinear Optical Materials. *J. Am. Chem. Soc.* **133**, 20001–20007 (2011).
18. Zhou, G. Q., Xu, J., Chen, X. D., Zhong, H. Y., Wang, S. T., Xu, K., Deng, P. Z. & Gan, F. X. Growth and Spectrum of a Novel Birefringent α-BaB2O4 Crystal. *J. Cryst. Growth* **191**, 517–519 (1998).
19. Ghosh, G. Dispersion-Equation Coefficients for the Refractive Index and Birefringence of Calcite and Quartz Crystals. *Opt. Commun.* **163**, 95–102 (1999).
20. Chen, K., Lin, C., Chen, J., Yang, G., Tian, H., Luo, M., Yan, T., Hu, Z., Wang, J., Wu, Y., Ye, N. & Peng, G. Intense d–p Hybridization in Nb3O15 Tripolymer Induced the Largest Second Harmonic Generation Response and Birefringence in Germanates. *Angew. Chem. Int. Ed.* **62**, e202217039 (2023).
21. Wu, C., Wei, G. F., Jiang, X. X., Xu, Q. K., Lin, Z. S., Huang, Z. P., Humphrey, M. G. & Zhang, C. Additive-Triggered Polar Polymorph Formation: β-Sc(IO3)3, a Promising Next-Generation Mid-Infrared Nonlinear Optical Material. *Angew. Chem. Int. Ed.* **61**, e202208514 (2022).
22. Lu, X. F., Chen, Z. H., Shi, X. R., Jing, Q. & Lee, M. H. Two Pyrophosphates with Large Birefringences and Second-Harmonic Responses as Ultraviolet Nonlinear Optical Materials. *Angew. Chem. Int. Ed.* **59**, 17648–17656 (2020).
23. Bai, Z. Y., Lee, J., Kim, H., Kuk, Y., Choi, M. H., Hu, C. L. & Ok, K. M. A Rare-Earth Selenite with Unexpectedly Well-Balanced Ultraviolet Nonlinear Optical Functionality, Sc(HSeO3)3. *Small* **19**, 2207709 (2023).
24. Song, Y. X., Luo, M., Lin, C. S. & Ye, N. Structural Modulation of Nitrate Group with Cations to Affect SHG Responses in RE(OH)2NO3 (RE = La, Y, and Gd): New Polar Materials with Large NLO Effect after Adjusting pH Values of Reaction Systems. *Chem. Mater.* **29**, 896–903 (2017).
25. Han, S. J., Mutailipu, M., Tudi, A., Yang, Z. H. & Pan, S. L. PbB5O7F3: A High-Performing Short-Wavelength Nonlinear Optical Material. *Chem. Mater.* **32**, 2172–2179 (2020).
26. Wu, H. P., Yu, H. W., Zhang, W. G., Cantwell, J., Poeppelmeier, K. R., Pan, S. L. & Halasyamani, P. S. Top-Seeded Solution Crystal Growth and Linear and Nonlinear Optical Properties of Ba4B11O20F. *Cryst. Growth Des.* **17**, 1404–1410 (2017).
27. Tian, H., Lin, C., Zhao, X., Fang, S., Li, H., Wang, C., Ye, N. & Luo, M. Design of a New Ultraviolet Nonlinear Optical Material KNO3SO3NH3 Exhibiting an Unexpected Strong Second Harmonic Generation Response. *Mater. Today Phys.* **28**, 100849 (2022).
28. Yu, H., Zhang, W., Young, J., Rondinelli, J. M. & Halasyamani, P. S. Bidenticity-Enhanced Second Harmonic Generation from Pb Chelation in Pb3Mg3TeP2O14. *J. Am. Chem. Soc.* **138**, 88–91 (2016).
29. Chen, Y. G., Jiang, X. X., Yang, Y. Y., Dai, Z., Lin, Z. S. & Zhang, X. M. PbBe2B2O6: An Ultraviolet Nonlinear-Optical Crystal with Unprecedented p–p Interacting BeBO5 Group. *Chem. Commun.* **58**, 12471–12474 (2022).
30. Yang, Y. Y., Xiao, Z., Li, B. X., Chen, Y. G., Guo, P. H., Zhang, B. B. & Zhang, X. M. Stereochemically Active Lone-Pair Containing Metal Substitution in Polar Axis toward a Giant Phase-Matchable Optical Nonlinear Silicate Crystal Li3(OH)PbSiO4. *J. Am. Chem. Soc.* **145**, 22577–22583 (2023).
31. Xiong, L., Chen, J., Lu, J., Pan, C. Y. & Wu, L. M. Monofluorophosphates: A New Source of Deep-Ultraviolet Nonlinear Optical Materials. *Chem. Mater.* **30**, 7823–7830 (2018).
32. Liu, L. L., Young, J., Smeu, M. & Halasyamani, P. S. Ba4B8TeO19: A UV Nonlinear Optical Material. *Inorg. Chem.* **57**, 4771–4776 (2018).
33. Zhang, B. B., Han, G. P., Wang, Y., Chen, X. L., Yang, Z. H. & Pan, S. L. Expanding Frontiers of Ultraviolet Nonlinear Optical Materials with Fluorophosphates. *Chem. Mater.* **30**, 5397–5403 (2018).
34. Li, Z. J., Jin, W. Q., Zhang, F. F., Chen, Z. L., Yang, Z. H. & Pan, S. L. Achieving Short-Wavelength Phase-Matching Second Harmonic Generation in Boron-Rich Borosulfate with Planar [BO3] Units. *Angew. Chem. Int. Ed.* **61**, e202112844 (2022).
35. Zhong, Y., Shan, P., Sun, T. Q., Hu, Z. P., Liu, H. D., Liu, S. G., Kong, Y. F. & Xu, J. J. Growth and Theoretical Study on the Deep-Ultraviolet Transparent β-CsBa2(PO3)5 Nonlinear Optical Crystal. *CrystEngComm* **21**, 4690–4695 (2019).
36. Bai, Z. Y., Hu, C. L., Liu, L. H., Zhang, L. Z., Huang, Y. S., Yuan, F. F. & Lin, Z. B. KMg(H2O)PO4: A Deep-Ultraviolet Transparent Nonlinear Optical Material Derived from KTiOPO4. *Chem. Mater.* **31**, 9540–9545 (2019).
37. Yu, H. W., Young, J., Wu, H. P., Zhang, W. G., Rondinelli, J. M. & Halasyamani, P. S. M4Mg4(P2O7)3 (M = K, Rb): Structural Engineering of Pyrophosphates for Nonlinear Optical Applications. *Chem. Mater.* **29**, 1845–1855 (2017).
38. Zhao, S. G., Yang, X. Y., Yang, Y., Kuang, X. J., Lu, F. Q., Shan, P., Sun, Z. H., Lin, Z. S., Hong, M. C. & Luo, J. H. Non-Centrosymmetric RbNaMgP2O7 with Unprecedented Thermo-Induced Enhancement of Second Harmonic Generation. *J. Am. Chem. Soc.* **140**, 1592–1595 (2018).
39. Yang, Y. C., Liu, X., Lu, J., Wu, L. M. & Chen, L. [Ag(NH3)2]2SO4: A Strategy for the Coordination of Cationic Moieties to Design Nonlinear Optical Materials. *Angew. Chem. Int. Ed.* **60**, 21216–21220 (2021).
40. Zhao, S. G., Zhang, J., Zhang, S. Q., Sun, Z. H., Lin, Z. S., Wu, Y. C., Hong, M. C. & Luo, J. H. A New UV Nonlinear Optical Material CsZn2B3O7: ZnO4 Tetrahedra Double the Efficiency of Second-Harmonic Generation. *Inorg. Chem.* **53**, 2521–2527 (2014).
41. Wu, H. P., Yu, H. W., Pan, S. L. & Halasyamani, P. S. Deep-Ultraviolet Nonlinear-Optical Material K3Sr3Li2Al4B6O20F: Addressing the Structural Instability Problem in KBe2BO3F2. *Inorg. Chem.* **56**, 8755–8758 (2017).
42. Liu, H. N., Wu, H. P., Hu, Z. G., Wang, J. Y., Wu, Y. C., Halasyamani, P. S. & Yu, H. W. Materials Design of a New Chemically Benign Deep-Ultraviolet Nonlinear Optical Material. *ACS Mater. Lett.* **5**, 155–161 (2023).
43. Gong, P. F., Kang, L. & Lin, Z. S. Realizing Deep-Ultraviolet Second Harmonic Generation by First-Principles-Guided Materials Exploration in Hydroxyborates. *J. Am. Chem. Soc.* **142** (35), 15157–15163 (2020).
44. Peng, G., Lin, C. S., Yang, Y., Zhao, D., Lin, Z. S., Ye, N. & Huang, J. S. Y2(CO3)3·H2O and (NH4)2Ca2Y4(CO3)9·H2O: Partial Aliovalent Cation Substitution Enabling Evolution from Centrosymmetry to Noncentrosymmetry for Nonlinear Optical Response. *Chem. Mater.* **31**, 52–56 (2019).
45. Zhang, Y. T., Long, Y., Dong, X. H., Wang, L., Huang, L., Zeng, H. M., Lin, Z. E., Wang, X. & Zou, G. H. Y8O(OH)15(CO3)3Cl: An Excellent Short-Wave UV Nonlinear Optical Material Exhibiting an Infrequent Three-Dimensional Inorganic Cationic Framework. *Chem. Commun.* **55**, 4538–4541 (2019).
46. Song, J., Li, C. G., Jiao, J. M., She, Y. H., Zhao, W. L., Liang, F., Ye, N., Hu, Z. G. & Wu, Y. C. KNa2La2(BO3)3: A Shortite-Type Lanthanide Borate Exhibiting Strong Nonlinear Optical Activity Induced by Isolated [BO3] Triangles and Distorted [LaO9] Polyhedra. *Inorg. Chem. Front.* **10**, 5488–5495 (2023).
47. Hao, X., Luo, M., Lin, C., Peng, G., Xu, F. & Ye, N. M(NH2SO3)2 (M = Sr, Ba): Two Deep-Ultraviolet Transparent Sulfamates Exhibiting Strong Second Harmonic Generation Responses and Moderate Birefringence. *Angew. Chem. Int. Ed.* **60**, 7621–7625 (2021).
48. Li, P. F., Hu, C. L., Mao, J. G. & Kong, F. A UV Non-Hydrogen Pure Selenite Nonlinear Optical Material for Achieving Balanced Properties through Framework-Optimized Structural Transformation. *Mater. Horiz.* **11**, 1704–1709 (2024).
49. Liu, H. N., Wu, H. P., Hu, Z. G., Wang, J. Y., Wu, Y. C. & Yu, H. W. Cs3[(BOP)2(B3O7)3]: A Deep-Ultraviolet Nonlinear Optical Crystal Designed by Optimizing Matching of Cation and Anion Groups. *J. Am. Chem. Soc.* **145**, 12691–12700 (2023).
50. Luo, M., Song, Y. X., Lin, C. S., Ye, N., Cheng, W. D. & Long, X. F. Molecular Engineering as an Approach To Design a New Beryllium-Free Fluoride Carbonate as a Deep-Ultraviolet Nonlinear Optical Material. *Chem. Mater.* **28**, 2301–2307 (2016).
51. Dong, X. H., Huang, L., Hu, C. F., Zeng, H. M., Lin, Z. E., Wang, X., Ok, K. M. & Zou, G. H. CsSbF2SO4: An Excellent Ultraviolet Nonlinear Optical Sulfate with a KTiOPO4 (KTP)-Type Structure. *Angew. Chem. Int. Ed.* **58**, 6528–6534 (2019).
52. Shi, G. Q., Wang, Y., Zhang, F. F., Zhang, B. B., Yang, Z. H., Hou, X. L., Pan, S. L. & Poeppelmeier, K. R. Finding the Next Deep-Ultraviolet Nonlinear Optical Material: NH4B4O6F. *J. Am. Chem. Soc.* **139**, 10645–10648 (2017).
53. Wu, C., Jiang, C. B., Wei, G. F., Jiang, X. X., Wang, Z. J., Lin, Z. S., Huang, Z. P., Humphrey, M. G. & Zhang, C. Toward Large Second-Harmonic Generation and Deep-UV Transparency in Strongly Electropositive Transition Metal Sulfates. *J. Am. Chem. Soc.* **145**, 3040–3046 (2023).
54. Liu, X. M., Kang, L., Gong, P. F. & Lin, Z. S. LiZn(OH)CO3: A Deep-Ultraviolet Nonlinear Optical Hydroxycarbonate Designed from a Diamond-Like Structure. *Angew. Chem. Int. Ed.* **60**, 13574–13578 (2021).
55. Yu, H., Wu, H., Pan, S., Yang, Z., Hou, X., Su, X., Jing, Q., Poeppelmeier, K. R. & Rondinelli, J. M. Cs3Zn6B9O21: A Chemically Benign Member of the KBBF Family Exhibiting the Largest Second Harmonic Generation Response. *J. Am. Chem. Soc.* **136**, 1264–1267 (2014).
56. Wu, C., Jiang, X. X., Wang, Z. J., Sha, H., Lin, Z. S., Huang, Z. P., Long, X. F., Humphrey, M. G. & Zhang, C. UV Solar-Blind-Region Phase-Matchable Optical Nonlinearity and Anisotropy in a π-Conjugated Cation-Containing Phosphate. *Angew. Chem. Int. Ed.* **60**, 14806–14810 (2021).
57. Mutailipu, M., Li, F. M., Jin, C. C., Yang, Z. H., Poeppelmeier, K. R. & Pan, S. L. Strong Nonlinearity Induced by Coaxial Alignment of Polar Chain and Dense [BO3] Units in CaZn2(BO3)2. *Angew. Chem. Int. Ed.* **61**, e202202096 (2022).
58. Yu, H. M., Zhang, W. G., Young, J., Rondinelli, J. M. & Halasyamani, P. S. Design and Synthesis of the Beryllium-Free Deep-Ultraviolet Nonlinear Optical Material Ba3(ZnB5O10)PO4. *Adv. Mater.* **27**, 7380–7385 (2015).
59. Wu, C., Jiang, X. X., Lin, L., Dan, W. Y., Lin, Z. S., Huang, Z. P., Humphrey, M. G. & Zhang, C. Strong SHG Responses in a Beryllium-Free Deep-UV-Transparent Hydroxyborate via Covalent Bond Modification. *Angew. Chem. Int. Ed.* **60**, 27151–27157 (2021).
60. Wu, T. H., Jiang, X. X., Wu, C., Hu, Y. L., Lin, Z. S., Huang, Z. P., Humphrey, M. G. & Zhang, C. Ultrawide Bandgap and Outstanding Second-Harmonic Generation Response by a Fluorine-Enrichment Strategy at a Transition-Metal Oxyfluoride Nonlinear Optical Material. *Angew. Chem. Int. Ed.* **61**, e202203104 (2022).
61. Dong, X. H., Huang, L., Liu, Q. Y., Zeng, H. M., Lin, Z. E., Xu, D. G. & Zou, G. H. Perfect Balance Harmony in Ba2NO3(OH)3: A Beryllium-Free Nitrate as a UV Nonlinear Optical Material. *Chem. Commun.* **54**, 5792–5795 (2018).
62. Deng, Y., Dong, X., Wang, L., Ok, K., Zeng, H., Lin, Z. & Zou, G. K2Sb(P2O7)F: Unprecedented Cairo Pentagonal Layer with New Bifunctional Genes Revealing Excellent Optical Performance. *Angew. Chem. Int. Ed.* **59**, 21151–21156 (2020).
63. Chen, K. C., Yang, Y., Peng, G., Yang, S. D., Yan, T., Fan, H. X., Lin, Z. S. & Ye, N. A2Bi2(SO4)2Cl4 (A = NH4, K, Rb): Achieving a Subtle Balance of the Large Second Harmonic Generation Effect and Sufficient Birefringence in Sulfate Nonlinear Optical Materials. *J. Mater. Chem. C* **7**, 9900–9907 (2019).
64. Sha, H. Y., Xiong, Z. Y., Xu, J. X., Wang, Z. J., Su, R. B., He, C., Yang, X. M., Long, X. F. & Liu, Y. Phosphogermanate Crystal: A New Ultraviolet–Infrared Nonlinear Optical Crystal with Excellent Optical Performances. *ACS Appl. Mater. Interfaces* **14**, 10588–10593 (2022).
65. Peng, G., Lin, C. & Ye, N. NaZnCO3(OH): A High-Performance Carbonate Ultraviolet Nonlinear Optical Crystal Derived from KBe2BO3F2. *J. Am. Chem. Soc.* **142**, 20542–20546 (2020).
66. Lin, D., Luo, M., Lin, C., Xu, F. & Ye, N. KLi(HC3N3O3)·2H2O: Solvent-Drop Grinding Method toward the Hydro-Isocyanurate Nonlinear Optical Crystal. *J. Am. Chem. Soc.* **141**, 3390–3394 (2019).
67. Yu, H., Zhang, W., Young, J., Rondinelli, J. M. & Halasyamani, P. S. Bidenticity-Enhanced Second Harmonic Generation from Pb Chelation in Pb3Mg3TeP2O14. *J. Am. Chem. Soc.* **138**, 88–91 (2016).
